# Supplementary material for: T cell migration and effector function differences in familial adenomatous polyposis patients with APC gene mutations
Source: PubMed Central journal article supplement (PMC10393261; doi:10.3389/fimmu.2023.1163466), 2023-07-18
Supplement: DataSheet_1.pdf [file DataSheet_1.pdf]

## *Supplementary Material*

### **T cell migration and effector function differences in familial adenomatous polyposis patients with APC gene mutations**

Céline Cuche<sup>1</sup>, Marta Mastrogiovanni<sup>1,2</sup>, Marie Juzans<sup>1,2</sup>, Hélène Laude<sup>3</sup>, Marie-Noëlle Ungeheuer<sup>3</sup>, Maria Isabella Gariboldi<sup>4#</sup>, Daniel Krentzel<sup>4#</sup>, , Daniel Scott-Algara<sup>1</sup>, Marianne Madec<sup>1</sup>, Sophie Goyard<sup>1,5</sup>, Camille Floch<sup>1,5</sup>, Gaëlle Chauveau-Le Fricc<sup>6</sup> Pierre Lafaye<sup>6</sup>, Charlotte Renaudat<sup>3</sup>, Muriel Le Bidan<sup>7</sup>, Christine Micallef<sup>7</sup>, Sandrine Schmutz<sup>8</sup>, Sébastien Mella<sup>8,9</sup>, Sophie Novault<sup>8</sup>, Milena Hasan<sup>8</sup>, Darragh Duffy<sup>10</sup>, Vincenzo Di Bartolo<sup>1\*†</sup>, Andrés Alcover<sup>1\*†</sup>

<sup>1</sup> Institut Pasteur, Université Paris Cité, INSERM-U1224, Unité Biologie Cellulaire des Lymphocytes, Ligue Nationale Contre le Cancer-Équipe Labellisée Ligue 2018. Paris, France.

<sup>2</sup> Sorbonne Université, Collège Doctoral, Paris, France.

<sup>3</sup> Institut Pasteur, Université Paris Cité, ICAReB, Paris, France.

<sup>4</sup> Institut Pasteur, Université Paris Cité, CNRS-UMR3691, Unité Imagerie et Modélisation. Paris, France.

<sup>5</sup> Institut Pasteur, Université Paris Cité, Plateforme d'Innovation et de Développement de Tests Diagnostiques. Paris, France.

<sup>6</sup> Institut Pasteur, Université Paris Cité, CNRS-UMR3528, Plateforme d'Ingénierie des Anticorps. Paris, France.

<sup>7</sup> Association Polyposes Familiales France. Linas, France

<sup>8</sup> Institut Pasteur, Université Paris Cité, Unité de Technologie et Service Cytométrie et Biomarqueurs, Paris, France.

<sup>9</sup> Institut Pasteur, Université Paris Cité, Hub Bioinformatique et Biostatistique. Paris, France.

<sup>10</sup> Institut Pasteur, Université Paris Cité, Unité Immunologie Translationnelle. Paris, France.

\*Corresponding authors

†VDB and AA share senior authorship

# MIG and DK contributed equally to this work

**Correspondence:** Andres Alcover [andres.alcover@pasteur.fr](mailto:andres.alcover@pasteur.fr) and Vincenzo Di Bartolo [vincenzo.di-bartolo@pasteur.fr](mailto:vincenzo.di-bartolo@pasteur.fr). Institut Pasteur. 28, Rue du Dr Roux. 75015 Paris. France.

| Cell surface marker      | Fluorochrome | Clone   | Reference   | Supplier         |
|--------------------------|--------------|---------|-------------|------------------|
| CD66b                    | FITC         | G10F5   | 2125515     | Sony             |
| CD25                     | PE           | BC96    | 302606      | Biolegend        |
| HLA-DR                   | PE-Dazzle594 | L243    | 2138265     | Sony             |
| CD45RA                   | BV570        |         | 304132      | Biolegend        |
| CD11c                    | PECy7        |         | 301607      | Biolegend        |
| CD3                      | PECy5        |         | 555341      | Becton Dickinson |
| CD14                     | AF532        | 61D3    | 58-0149-41  | Invitrogen       |
| CD45                     | BV480        | HI30    | 566115      | Becton Dickinson |
| CD16                     | BV510        | 3G8     | 2110235     | Sony             |
| CD8a                     | BB700        | RPA-T8  | 566451      | Becton Dickinson |
| CD123                    | BV605        | 6H6     | 306025      | Biolegend        |
| CD27                     | BV650        | O323    | 302827      | Biolegend        |
| CD56                     | BV711        | HCD56   | 318336      | Biolegend        |
| CD19                     | BV750        | HIB19   | 302261      | Biolegend        |
| TCRgd                    | BV785        | B1      | 740995      | Becton Dickinson |
| CD4                      | APC          | OKT4    | 317415      | Biolegend        |
| CD3                      | ECD          | UCHT1   | A07748      | Beckman          |
| CD69                     | BV785        | FN50    | 310931      | Biolegend        |
| CD158d                   | PE           | mAb33   | 347005      | Biolegend        |
| NKG2C                    | BV605        | 134591  | 748166      | Becton Dickinson |
| NKG2D                    | FITC         | 1D11    | 820819      | Biolegend        |
| CD85j                    | PECy7        | GHI/75  | 333711      | Biolegend        |
| CD226 (DNAM)             | BV785        | DX11    | 742497      | Becton Dickinson |
| CD161                    | PECy7        | HP-3G10 | 339917      | Biolegend        |
| NKp44 (CD336)            | BV605        | p44-8   | 744301      | Becton Dickinson |
| NKp80                    | PE           | 5D12    | 346706      | Biolegend        |
| CD158e1 (KIR3DL1)        | BV785        | CD158e1 | 742982      | Becton Dickinson |
| NKp46                    | FITC         | 9E2     | 331922      | Biolegend        |
| CD158e1/e2 (KIR3DL1/DS1) | PE           | Z27.3.7 | IM3292      | Beckman          |
| NKG2a (CD159a)           | BV605        | 131411  | 747921      | Becton Dickinson |
| CD160                    | PECy7        | BY55    | 341211      | Biolegend        |
| CD158a (KIR2DL1)         | FITC         | HP-3E4  | 556062      | Becton Dickinson |
| 2B4 (CD244)              | PECy7        | C1.7    | 329520      | Biolegend        |
| CD158i                   | PE           | jjC11.6 | 130-099-698 | Miltenyi         |
| CD158b (KIR2DL2/3)       | BV605        | CH-L    | 743453      | Becton Dickinson |
| NKp30                    | BV785        | p30-15  | 743172      | Becton Dickinson |
| NKT                      | BV480        | 6B11    | 746788      | Becton Dickinson |
| Va7.2                    | BB700        | OF-5A12 | 749483      | Becton Dickinson |
| TCRgd                    | BV650        | B1      | 564156      | Becton Dickinson |
| CD8a                     | BV570        | RPA-T8  | 301038      | Biolegend        |

**Supplementary Table 1. Whole blood immunophenotyping antibodies**

Probe name and NS probe ID Nanostring

| probe name | NS Probe ID        | probe name | NS Probe ID         | probe name | NS Probe ID         |
|------------|--------------------|------------|---------------------|------------|---------------------|
| ABCB1      | NM_000927.3:3910   | DPP4       | NM_001935.3:2700    | LILRA5     | NM_181879.2:545     |
| ABL1       | NM_005157.3:3200   | DUSP4      | NM_057158.2:3115    | LILRA6     | NM_024318.2:1900    |
| ADA        | NM_000022.2:1300   | EBI3       | NM_005755.2:485     | LILRB1     | NM_001081637.1:2332 |
| AHR        | NM_001621.3:1900   | EDNRB      | NM_003991.2:560     | LILRB2     | NM_005874.1:595     |
| AICDA      | NM_020661.1:567    | EGR1       | NM_001964.2:1505    | LILRB3     | NM_006864.2:2235    |
| AIRE       | NM_000383.2:1864   | EGR2       | NM_000399.3:1891    | LILRB4     | NM_001081438.1:1825 |
| APP        | NM_000484.3:1725   | ENTPD1     | NM_001098175.1:8830 | LILRB5     | NM_001081442.1:327  |
| ARG1       | NM_000045.2:505    | EOMES      | NM_005442.2:1670    | LITAF      | NM_004862.3:1000    |
| ARG2       | NM_001172.3:1150   | ETS1       | NM_005238.3:4625    | LTA        | NM_000595.2:885     |
| ARHGDI8    | NM_001175.4:833    | FADD       | NM_003824.2:1560    | LTB4R      | NM_181657.3:2400    |
| ATG10      | NM_001131028.1:985 | FAS        | NM_000043.3:90      | LTB4R2     | NM_019839.4:1250    |
| ATG12      | NM_004707.2:25     | FCAR       | NM_133280.1:75      | LTBR       | NM_002342.1:1435    |
| ATG16L1    | NM_198890.2:1975   | FCER1A     | NM_002001.2:114     | LTF        | NM_002343.2:590     |
| ATG5       | NM_004849.2:1104   | FCER1G     | NM_004106.1:36      | LY96       | NM_015364.2:360     |
| ATG7       | NM_001136031.2:810 | FCGR1A/B   | NM_000566.3:1545    | MAF        | NM_005360.4:2198    |
| ATM        | NM_000051.3:30     | FCGR2A     | NM_021642.3:60      | MALT1      | NM_006785.2:909     |
| B2M        | NM_004048.2:235    | FCGR2A/C   | NM_201563.4:1166    | MAP4K1     | NM_007181.3:780     |
| B3GAT1     | NM_018644.3:2388   | FCGR2B     | NM_001002273.1:870  | MAP4K2     | NM_004579.2:1610    |
| BATF       | NM_006399.3:293    | FCGR3A/B   | NM_000570.4:696     | MAP4K4     | NM_004834.3:3315    |
| BATF3      | NM_018664.2:770    | FCGRT      | NM_004107.4:1276    | MAPK1      | NM_138957.2:430     |
| BAX        | NM_138761.3:342    | FKBP5      | NM_001145775.1:540  | MAPK11     | NM_002751.5:1310    |
| BCAP31     | NM_005745.7:495    | FN1        | NM_212482.1:1776    | MAPK14     | NM_001315.1:450     |
| BCL10      | NM_003921.2:1250   | FOXP3      | NM_014009.3:1230    | MAPKAPK2   | NM_004759.3:710     |
| BCL2       | NM_000657.2:947    | FYN        | NM_002037.3:765     | MARCO      | NM_006770.3:1434    |
| BCL2L11    | NM_138621.4:257    | GATA3      | NM_001002295.1:2835 | MASP1      | NM_139125.3:35      |
| BCL3       | NM_005178.2:450    | GBP1       | NM_002053.1:2110    | MASP2      | NM_139208.1:330     |
| BCL6       | NM_001706.2:675    | GBP5       | NM_052942.3:1955    | MBL2       | NM_000242.2:1756    |
| BID        | NM_001196.2:1875   | GFI1       | NM_005263.2:2235    | MBP        | NM_002385.2:132     |
| BLNK       | NM_013314.2:930    | GNLY       | NM_006433.2:305     | MCL1       | NM_021960.3:1260    |
| BST1       | NM_004334.2:710    | GP1BB      | NM_000407.4:146     | MIF        | NM_002415.1:319     |
| BST2       | NM_004335.2:560    | GPI        | NM_000175.2:1695    | MME        | NM_000902.2:5059    |
| BTK        | NM_000061.1:570    | GPR183     | NM_004951.3:405     | MR1        | NM_001531.2:7695    |
| BTLA       | NM_181780.2:305    | GZMA       | NM_006144.2:155     | MRC1       | NM_002438.2:525     |
| C14orf166  | NM_016039.2:210    | GZMB       | NM_004131.3:540     | MS4A1      | NM_152866.2:620     |
| C1QA       | NM_015991.2:718    | GZMK       | NM_002104.2:700     | MSR1       | NM_002445.3:326     |
| C1QB       | NM_000491.3:819    | HAMP       | NM_021175.2:99      | MUC1       | NM_001018017.1:725  |
| C1QBP      | NM_001212.3:745    | HAVCR2     | NM_032782.3:955     | MX1        | NM_002462.2:1485    |
| C1R        | NM_001733.4:760    | HFE        | NM_139011.2:875     | MYD88      | NM_002468.3:2145    |
| C1S        | NM_001734.2:775    | HLA-A      | NM_002116.5:1000    | NCAM1      | NM_000615.5:1620    |
| C2         | NM_000063.3:1075   | HLA-B      | NM_005514.6:937     | NCF4       | NM_000631.4:210     |
| C3         | NM_000064.2:4396   | HLA-C      | NM_002117.4:895     | NCR1       | NM_004829.5:602     |
| C4A/B      | NM_007293.2:1217   | HLA-DMA    | NM_006120.3:380     | NFATC1     | NM_172389.1:1984    |
| C4BPA      | NM_000715.3:690    | HLA-DMB    | NM_002118.3:20      | NFATC2     | NM_012340.3:1815    |
| C5         | NM_001735.2:2592   | HLA-DOB    | NM_002120.3:230     | NFATC3     | NM_004555.2:2190    |
| C6         | NM_000065.2:3170   | HLA-DPA1   | NM_033554.2:857     | NFIL3      | NM_005384.2:1795    |
| C7         | NM_000587.2:310    | HLA-DPB1   | NM_002121.4:931     | NFKB1      | NM_003998.2:1675    |
| C8A        | NM_000562.2:690    | HLA-DQA1   | NM_002122.3:261     | NFKB2      | NM_002502.2:825     |
| C8B        | NM_000066.2:620    | HLA-DQB1   | NM_002123.3:384     | NFKBIA     | NM_020529.1:945     |
| C8G        | NM_000606.2:407    | HLA-DRA    | NM_019111.3:335     | NFKBIZ     | NM_001005474.1:2030 |
| C9         | NM_001737.3:602    | HLA-DRB1   | NM_002124.2:104     | NLRP3      | NM_001079821.2:415  |
| CAMP       | NM_004345.3:220    | HLA-DRB3   | NM_022555.3:698     | NOD1       | NM_006092.1:3285    |
| CARD9      | NM_052813.4:1525   | HRAS       | NM_005343.2:396     | NOD2       | NM_022162.1:4080    |
| CASP1      | NM_001223.3:971    | ICAM1      | NM_000201.2:2253    | NOS2       | NM_000625.4:605     |
| CASP10     | NM_032977.3:20     | ICAM2      | NM_000873.3:415     | NOTCH1     | NM_017617.3:735     |
| CASP2      | NM_032982.2:1710   | ICAM3      | NM_002162.3:1225    | NOTCH2     | NM_024408.3:2842    |

Supplementary Table 2.1. Expressed genes assessed by Nanostring (1/4)

Probe name and NS probe ID Nanostring

| probe name | NS Probe ID         | probe name | NS Probe ID        | probe name | NS Probe ID         |
|------------|---------------------|------------|--------------------|------------|---------------------|
| CASP3      | NM_032991.2:685     | ICAM4      | NM_001039132.1:463 | NT5E       | NM_002526.2:1214    |
| CASP8      | NM_001228.4:301     | ICAM5      | NM_003259.3:327    | PAX5       | NM_016734.1:2288    |
| CCBP2      | NM_001296.3:1345    | ICOS       | NM_012092.2:640    | PDCD1      | NM_005018.1:175     |
| CCL11      | NM_002986.2:378     | ICOSLG     | NM_015259.4:1190   | PDCD1LG2   | NM_025239.3:235     |
| CCL13      | NM_005408.2:320     | IDO1       | NM_002164.3:50     | PDCD2      | NM_144781.2:288     |
| CCL15      | NM_032965.3:112     | IFI16      | NM_005531.1:2255   | PDGFB      | NM_033016.2:1480    |
| CCL16      | NM_004590.2:367     | IFI35      | NM_005533.3:415    | PDGFRB     | NM_002609.3:840     |
| CCL18      | NM_002988.2:585     | IFIH1      | NM_022168.2:185    | PECAM1     | NM_000442.3:1365    |
| CCL19      | NM_006274.2:401     | IFIT2      | NM_001547.4:1995   | PIGR       | NM_002644.2:215     |
| CCL2       | NM_002982.3:123     | IFITM1     | NM_003641.3:482    | PLA2G2A    | NM_000300.2:715     |
| CCL20      | NM_004591.1:35      | IFNA1/13   | NM_024013.1:585    | PLA2G2E    | NM_014589.1:266     |
| CCL22      | NM_002990.3:797     | IFNA2      | NM_000605.3:611    | PLAU       | NM_002658.2:793     |
| CCL23      | NM_145898.1:336     | IFNAR1     | NM_000629.2:3123   | PLAUR      | NM_001005376.1:440  |
| CCL24      | NM_002991.2:18      | IFNAR2     | NM_000874.3:631    | PML        | NM_002675.3:281     |
| CCL26      | NM_006072.4:184     | IFNB1      | NM_002176.2:610    | POU2F2     | NM_002698.2:908     |
| CCL3       | NM_002983.2:159     | IFNG       | NM_000619.2:970    | PPARG      | NM_015869.3:1035    |
| CCL4       | NM_002984.2:35      | IFNGR1     | NM_000416.1:1140   | PPBP       | NM_002704.2:330     |
| CCL5       | NM_002985.2:280     | IGF2R      | NM_000876.1:2605   | PRDM1      | NM_001198.3:798     |
| CCL7       | NM_006273.2:120     | IKBKAP     | NM_003640.3:1130   | PRF1       | NM_005041.3:2120    |
| CCL8       | NM_005623.2:689     | IKBKB      | NM_001556.1:1995   | PRKCD      | NM_006254.3:2165    |
| CCND3      | NM_001760.2:1215    | IKBKE      | NM_014002.2:2470   | PSMB10     | NM_002801.2:221     |
| CCR1       | NM_001295.2:535     | IKBKG      | NM_003639.2:470    | PSMB5      | NM_001130725.1:716  |
| CCR10      | NM_016602.2:843     | IKZF1      | NM_006060.3:4485   | PSMB7      | NM_002799.2:420     |
| CCR2       | NM_001123041.2:743  | IKZF2      | NM_016260.2:870    | PSMB8      | NM_004159.4:1215    |
| CCR5       | NM_000579.1:2730    | IKZF3      | NM_183232.2:1176   | PSMB9      | NM_002800.4:455     |
| CCR6       | NM_031409.2:935     | IL10       | NM_000572.2:230    | PSMC2      | NM_002803.3:446     |
| CCR7       | NM_001838.2:1610    | IL10RA     | NM_001558.2:150    | PSMD7      | NM_002811.3:580     |
| CCR8       | NM_005201.2:245     | IL11RA     | NM_147162.1:400    | PTAFR      | NM_000952.3:1035    |
| CCRL1      | NM_016557.2:854     | IL12A      | NM_000882.2:775    | PTGER4     | NM_000958.2:1380    |
| CCRL2      | NM_003965.4:1110    | IL12B      | NM_002187.2:1435   | PTGS2      | NM_000963.1:495     |
| CD14       | NM_000591.2:885     | IL12RB1    | NM_005535.1:225    | PTK2       | NM_005607.3:1005    |
| CD160      | NM_007053.2:500     | IL13       | NM_002188.2:516    | PTPN2      | NM_002828.2:185     |
| CD163      | NM_004244.4:1630    | IL13RA1    | NM_001560.2:1230   | PTPN22     | NM_015967.4:2505    |
| CD164      | NM_006016.4:2575    | IL15       | NM_172174.1:1685   | PTPN6      | NM_002831.5:1734    |
| CD19       | NM_001770.4:1770    | IL16       | NM_004513.4:1262   | PTPRC_all  | NM_080921.2:90      |
| CD1A       | NM_001763.2:1815    | IL17A      | NM_002190.2:240    | PYCARD     | NM_013258.3:714     |
| CD1D       | NM_001766.3:1428    | IL17B      | NM_014443.2:177    | RAF1       | NM_002880.2:1990    |
| CD2        | NM_001767.3:687     | IL17F      | NM_052872.3:210    | RAG1       | NM_000448.2:2300    |
| CD209      | NM_021155.2:1532    | IL18       | NM_001562.2:48     | RAG2       | NM_000536.3:655     |
| CD22       | NM_001771.2:2515    | IL18R1     | NM_003855.2:2025   | RARRES3    | NM_004585.3:640     |
| CD24       | NM_013230.2:95      | IL18RAP    | NM_003853.2:2412   | RELA       | NM_021975.2:360     |
| CD244      | NM_016382.2:1150    | IL19       | NM_013371.3:1030   | RELB       | NM_006509.2:250     |
| CD247      | NM_198053.1:1490    | IL1A       | NM_000575.3:1085   | RORC       | NM_001001523.1:1350 |
| CD27       | NM_001242.4:330     | IL1B       | NM_000576.2:840    | RUNX1      | NM_001754.4:635     |
| CD274      | NM_014143.3:1245    | IL1R1      | NM_000877.2:4295   | S100A8     | NM_002964.3:115     |
| CD276      | NM_001024736.1:2120 | IL1R2      | NM_173343.1:113    | S100A9     | NM_002965.2:75      |
| CD28       | NM_001243078.1:2065 | IL1RAP     | NM_002182.2:460    | S1PR1      | NM_001400.3:1065    |
| CD34       | NM_001025109.1:1580 | IL1RL1     | NM_016232.4:700    | SELE       | NM_000450.2:1505    |
| CD36       | NM_001001548.2:705  | IL1RL2     | NM_003854.2:595    | SELL       | NR_029467.1:1585    |
| CD3D       | NM_000732.4:110     | IL1RN      | NM_000577.3:480    | SELPLG     | NM_003006.3:2297    |
| CD3E       | NM_000733.2:75      | IL2        | NM_000586.2:300    | SERPING1   | NM_000062.2:305     |
| CD3EAP     | NM_012099.1:555     | IL20       | NM_018724.3:292    | SH2D1A     | NM_001114937.2:495  |
| CD4        | NM_000616.4:975     | IL21       | NM_021803.2:65     | SIGIRR     | NM_021805.2:469     |
| CD40       | NM_001250.4:1265    | IL21R      | NM_021798.2:2080   | SKI        | NM_003036.2:3335    |
| CD40LG     | NM_000074.2:1225    | IL22       | NM_020525.4:319    | SLAMF1     | NM_003037.2:580     |
| CD44       | NM_001001392.1:429  | IL22RA2    | NM_181310.1:290    | SLAMF6     | NM_001184714.1:1032 |
| CD45R0     | NM_080921.3:258     | IL23A      | NM_016584.2:411    | SLAMF7     | NM_021181.3:215     |

Supplementary Table 2.2. Expressed genes assessed by Nanostring (2/4)

Probe name and NS probe ID Nanostring

| probe name | NS Probe ID           | probe name      | NS Probe ID         | probe name | NS Probe ID         |
|------------|-----------------------|-----------------|---------------------|------------|---------------------|
| CD45RA     | NM_002838.4:258       | IL23R           | NM_144701.2:710     | SLC2A1     | NM_006516.2:2500    |
| CD45RB     | ENST00000367367.1:131 | IL26            | NM_018402.1:80      | SMAD3      | NM_005902.3:4220    |
| CD46       | NM_172350.1:365       | IL27            | NM_145659.3:143     | SMAD5      | NM_005903.5:1044    |
| CD48       | NM_001778.2:270       | IL28A           | NM_172138.1:589     | SOCS1      | NM_003745.1:1025    |
| CD5        | NM_014207.2:1295      | IL28A/B         | NM_172139.2:104     | SOCS3      | NM_003955.3:1870    |
| CD53       | NM_001040033.1:835    | IL29            | NM_172140.1:233     | SPP1       | NM_000582.2:760     |
| CD55       | NM_000574.3:101       | IL2RA           | NM_000417.1:1000    | SRC        | NM_005417.3:1410    |
| CD58       | NM_001779.2:478       | IL2RB           | NM_000878.2:1980    | STAT1      | NM_007315.2:205     |
| CD59       | NM_000611.4:730       | IL2RG           | NM_000206.1:595     | STAT2      | NM_005419.2:1965    |
| CD6        | NM_006725.3:1280      | IL3             | NM_000588.3:130     | STAT3      | NM_139276.2:4535    |
| CD7        | NM_006137.6:440       | IL32            | NM_001012633.1:758  | STAT4      | NM_003151.2:789     |
| CD70       | NM_001252.2:190       | IL4             | NM_000589.2:625     | STAT5A     | NM_003152.2:3460    |
| CD74       | NM_001025159.1:964    | IL4R            | NM_000418.2:705     | STAT5B     | NM_012448.3:200     |
| CD79A      | NM_001783.3:695       | IL5             | NM_000879.2:105     | STAT6      | NM_003153.3:2030    |
| CD79B      | NM_021602.2:24        | IL6             | NM_000600.1:220     | SYK        | NM_003177.3:1685    |
| CD80       | NM_005191.3:1288      | IL6R            | NM_000565.2:993     | TAGAP      | NM_054114.3:169     |
| CD81       | NM_004356.3:735       | IL6ST           | NM_002184.2:2505    | TAL1       | NM_003189.2:4635    |
| CD82       | NM_002231.3:1211      | IL7             | NM_000880.2:38      | TAP1       | NM_000593.5:2075    |
| CD83       | NM_004233.3:1960      | IL7R            | NM_002185.2:1610    | TAP2       | NM_000544.3:909     |
| CD86       | NM_175862.3:1265      | IL8             | NM_000584.2:25      | TAPBP      | NM_003190.4:1536    |
| CD8A       | NM_001768.5:1320      | IL9             | NM_000590.1:300     | TBK1       | NM_013254.2:1610    |
| CD8B       | NM_004931.3:440       | ILF3            | NM_001137673.1:730  | TBX21      | NM_013351.1:890     |
| CD9        | NM_001769.2:405       | IRAK1           | NM_001569.3:1995    | TCF4       | NM_003199.1:1455    |
| CD96       | NM_005816.4:1355      | IRAK2           | NM_001570.3:1285    | TCF7       | NM_003202.2:2420    |
| CD97       | NM_078481.2:1370      | IRAK3           | NM_007199.1:1735    | TFRC       | NM_003234.1:1220    |
| CD99       | NM_002414.3:625       | IRAK4           | NM_016123.1:2175    | TGFB1      | NM_000660.3:1260    |
| CDH5       | NM_001795.3:3405      | IRF1            | NM_002198.1:510     | TGFBI      | NM_000358.2:2030    |
| CDKN1A     | NM_000389.2:1975      | IRF3            | NM_001571.5:1303    | TGFBR1     | NM_004612.2:4280    |
| CEACAM1    | NM_001712.3:2455      | IRF4            | NM_002460.1:325     | TGFBR2     | NM_001024847.1:1760 |
| CEACAM6    | NM_002483.4:1217      | IRF5            | NM_002200.3:1845    | THY1       | NM_006288.2:135     |
| CEACAM8    | NM_001816.3:825       | IRF7            | NM_001572.3:1763    | TICAM1     | NM_014261.1:518     |
| CEBPB      | NM_005194.2:1420      | IRF8            | NM_002163.2:253     | TIGIT      | NM_173799.2:1968    |
| CFB        | NM_001710.5:2029      | IRGM            | NM_001145805.1:1412 | TIRAP      | NM_148910.2:661     |
| CFD        | NM_001928.2:859       | ITGA2B          | NM_000419.3:740     | TLR1       | NM_003263.3:545     |
| CFH        | NM_001014975.2:702    | ITGA4           | NM_000885.4:975     | TLR2       | NM_003264.3:180     |
| CFI        | NM_000204.3:1780      | ITGA5           | NM_002205.2:925     | TLR3       | NM_003265.2:230     |
| CFP        | NM_002621.2:380       | ITGA6           | NM_000210.1:3065    | TLR4       | NM_138554.2:2570    |
| CHUK       | NM_001278.3:860       | ITGAE           | NM_002208.4:3405    | TLR5       | NM_003268.3:215     |
| CIITA      | NM_000246.3:470       | ITGAL           | NM_002209.2:3905    | TLR7       | NM_016562.3:4120    |
| CISH       | NM_145071.2:558       | ITGAM           | NM_000632.3:515     | TLR8       | NM_016610.2:2310    |
| CLEC4A     | NM_194448.2:388       | ITGAX           | NM_000887.3:700     | TLR9       | NM_017442.2:985     |
| CLEC4E     | NM_014358.2:570       | ITGB1           | NM_003666.2:2000    | TMEM173    | NM_198282.1:725     |
| CLEC5A     | NM_013252.2:615       | ITGB2           | NM_000211.2:520     | TNF        | NM_000594.2:1010    |
| CLEC6A     | NM_001007033.1:342    | ITLN1           | NM_017625.2:975     | TNFAIP3    | NM_006290.2:260     |
| CLEC7A     | NM_197954.2:55        | ITLN2           | NM_080878.2:135     | TNFAIP6    | NM_007115.2:250     |
| CLU        | NM_001831.2:2340      | JAK1            | NM_002227.1:285     | TNFRSF10C  | NM_003841.3:682     |
| CMKLR1     | NM_004072.1:770       | JAK2            | NM_004972.2:455     | TNFRSF11A  | NM_003839.2:490     |
| CR1        | NM_000651.4:1695      | JAK3            | NM_000215.2:1715    | TNFRSF13B  | NM_012452.2:160     |
| CR2        | NM_001006658.1:485    | KCNJ2           | NM_000891.2:620     | TNFRSF13C  | NM_052945.3:789     |
| CRADD      | NM_003805.3:675       | KIR3DL1         | NM_013289.2:1691    | TNFRSF14   | NM_003820.2:916     |
| CSF1       | NM_000757.4:823       | KIR3DL2         | NM_006737.2:884     | TNFRSF17   | NM_001192.2:635     |
| CSF1R      | NM_005211.2:3775      | KIR3DL3         | NM_153443.3:539     | TNFRSF1B   | NM_001066.2:835     |
| CSF2       | NM_000758.2:475       | ctivating_Subgr | NM_001083539.1:1146 | TNFRSF4    | NM_003327.2:200     |
| CSF2RB     | NM_000395.2:3300      | ctivating_Subgr | NM_014512.1:718     | TNFRSF8    | NM_152942.2:2030    |
| CSF3R      | NM_156038.2:90        | nhibiting_Subgr | NM_014218.2:872     | TNFRSF9    | NM_001561.4:255     |
| CTLA4-TM   | NM_005214.3:554       | nhibiting_Subgr | NM_014511.3:592     | TNFSF10    | NM_003810.2:115     |
| CTLA4_all  | NM_005214.3:405       | KIT             | NM_000222.2:2644    | TNFSF11    | NM_003701.2:490     |

Supplementary Table 2.3. Expressed genes assessed by Nanostring (3/4)

Probe name and NS probe ID Nanostring

| probe name | NS Probe ID         | probe name | NS Probe ID        | probe name | NS Probe ID         |
|------------|---------------------|------------|--------------------|------------|---------------------|
| CTNNB1     | NM_001098210.1:1815 | KLRAP1     | NR_028045.1:414    | TNFSF12    | NM_003809.2:339     |
| CTSC       | NM_001814.4:260     | KLRB1      | NM_002258.2:85     | TNFSF13B   | NM_006573.4:1430    |
| CTSG       | NM_001911.2:160     | KLRC1      | NM_002259.3:335    | TNFSF15    | NM_001204344.1:2338 |
| CTSS       | NM_004079.3:685     | KLRC2      | NM_002260.3:942    | TNFSF4     | NM_003326.2:545     |
| CUL9       | NM_015089.2:2675    | KLRC3      | NM_007333.2:598    | TNFSF8     | NM_001244.3:518     |
| CX3CL1     | NM_002996.3:140     | KLRC4      | NM_013431.2:276    | TOLLIP     | NM_019009.2:1320    |
| CX3CR1     | NM_001337.3:1040    | KLRD1      | NM_002262.3:542    | TP53       | NM_000546.2:1330    |
| CXCL1      | NM_001511.1:742     | KLRF1      | NM_016523.1:275    | TRAF1      | NM_005658.3:3735    |
| CXCL10     | NM_001565.1:40      | KLRF2      | NM_001190765.1:535 | TRAF2      | NM_021138.3:1325    |
| CXCL11     | NM_005409.4:282     | KLRG1      | NM_005810.3:65     | TRAF3      | NM_145725.1:1795    |
| CXCL12     | NM_000609.5:210     | KLRG2      | NM_198508.2:1347   | TRAF4      | NM_004295.2:1060    |
| CXCL13     | NM_006419.2:210     | KLRK1      | NM_007360.1:760    | TRAF5      | NM_004619.3:400     |
| CXCL2      | NM_002089.3:854     | LAG3       | NM_002286.5:1735   | TRAF6      | NM_145803.1:1839    |
| CXCL9      | NM_002416.1:1975    | LAIR1      | NM_002287.3:1195   | TYK2       | NM_003331.3:485     |
| CXCR1      | NM_000634.2:1950    | LAMP3      | NM_014398.3:1400   | UBE2L3     | NM_198157.1:990     |
| CXCR2      | NM_001557.2:2055    | LCK        | NM_005356.2:1260   | VCAM1      | NM_001078.3:2535    |
| CXCR3      | NM_001504.1:80      | LCP2       | NM_005565.3:1210   | VTN        | NM_000638.3:1346    |
| CXCR4      | NM_003467.2:1335    | LEF1       | NM_016269.3:1165   | XBP1       | NM_005080.2:440     |
| CXCR6      | NM_006564.1:95      | LGALS3     | NM_001177388.1:495 | XCL1       | NM_002995.1:620     |
| CYBB       | NM_000397.3:2686    | LIF        | NM_002309.3:1240   | XCR1       | NM_005283.2:700     |
| DEFB1      | NM_005218.3:40      | LILRA1     | NM_006863.1:1719   | ZAP70      | NM_001079.3:1175    |
| DEFB103A   | NM_001081551.2:106  | LILRA2     | NM_006866.2:317    | ZBTB16     | NM_006006.4:1585    |
| DEFB103B   | NM_018661.3:114     | LILRA3     | NM_006865.3:1123   | ZEB1       | NM_001128128.1:1450 |
| DEFB4A     | NM_004942.2:97      | LILRA4     | NM_012276.3:1577   | sCTLA4     | NM_001037631.1:560  |

**Supplementary Table 2.4. Expressed genes assessed by Nanostring (4/4)**

| Luminex Assay – Analytes |                       |
|--------------------------|-----------------------|
| CD40 Ligand              | IL-8/CXCL8            |
| EGF                      | IL-10                 |
| Eotaxin/CCL11            | IL-12p70              |
| FGF basic                | IL-13                 |
| Flt-3 ligand             | IL-15                 |
| G-CSF                    | IL-17A                |
| GM-CSF                   | IL-17E/IL-25          |
| Granzyme B               | IL-33                 |
| GRO $\alpha$ /CXCL1      | IP-10/CXCL10          |
| GRO $\beta$ /CXCL2       | MCP-1/CCL2            |
| IFN $\alpha$             | MIP-1 $\alpha$ /CCL3  |
| IFN $\beta$              | MIP-1 $\beta$ /CCL4   |
| IFN $\gamma$             | MIP-3 $\alpha$ /CCL20 |
| IL-1 $\alpha$            | MIP-3 $\beta$ /CCL19  |
| IL-1 $\beta$             | PDGF-AA               |
| IL-1ra                   | PDGF-AB/BB            |
| IL-2                     | PD-L1/B7-H1           |
| IL-3                     | RANTES                |
| IL-4                     | TGF- $\alpha$         |
| IL-5                     | TNF                   |
| IL-6                     | TRAIL                 |
| IL-7                     | VEGF                  |

**Supplementary Table 3. Secreted proteins assessed by Luminex**

| Gene\stim | ns     | C.alb  | SEB    | CD3/28  | Gene\stim       | ns    | C.alb | SEB   | CD3/28  |
|-----------|--------|--------|--------|---------|-----------------|-------|-------|-------|---------|
| ABCB1     |        |        |        | down*   | IL12B           |       | up**  | down* |         |
| ATM       |        | up*    |        |         | IL13RA1         |       |       |       | down*   |
| BLNK      |        |        | up**   |         | IL16            | up**  |       |       |         |
| CAMP      |        |        | down*  | down*   | IL22RA2         |       | up*   |       |         |
| CASP3     |        | up*    |        |         | IL23A           |       | down* |       |         |
| CASP8     |        |        |        | down*   | IL23R           | up*   |       |       |         |
| CEACAM6   |        |        |        | down*   | IRAK1           | up*   |       |       | up**    |
| CEACAM8   |        |        |        | down*   | IRF5            |       |       |       | up*     |
| CCL2      |        | down*  |        |         | ITLN1           |       |       |       | down*   |
| CCL3      |        |        |        | up*     | JAK1            | up*   |       |       |         |
| CCL7      |        | down** |        |         | KCNJ2           |       | up*   |       |         |
| CCR1      |        |        | up*    |         | KIR_Act_Subgr_1 | down* |       |       | down*   |
| CCRL1     |        | up*    |        |         | KIR_Inh_Subgr_1 |       |       | down* | down*   |
| CD3EAP    |        | down*  |        |         | KIR_Inh_Subgr_2 | down* |       | down* | down*   |
| CD7       |        |        | down*  |         | KLRF1           |       |       | down* | down*   |
| CD8B      |        |        | down*  |         | LAG3            | down* | down* |       | up*     |
| CD19      | up*    |        |        |         | LEF1            |       |       | down* |         |
| CD22      |        | up*    | up*    | up*     | LIF             |       | up*   |       |         |
| CD40      |        |        |        | up*     | LTF             |       |       |       | down*   |
| CD45RB    |        |        |        | down*   | MALT1           |       |       | down* |         |
| CD70      |        |        |        | up*     | MAPK1           |       |       |       | down*** |
| CD79B     |        | up*    | up*    |         | MAP4K1          |       |       |       | up*     |
| CD96      |        |        | down*  |         | MS4A1           | up*   | up*   | up*   |         |
| CFB       |        |        |        | up*     | NCR1            |       |       | down* | down*   |
| CFD       | up*    | up*    |        |         | NOD1            |       |       |       | up*     |
| CFI       |        | up*    |        |         | NOTCH2          |       | up**  |       |         |
| CFP       |        |        |        | down*   | PAX5            |       | up*   |       |         |
| CLEC4A    |        |        | up*    |         | PDCD1           |       |       |       | up*     |
| CR2       |        | up*    |        |         | PECAM1          |       |       |       | down*   |
| CSF1      | up*    | down*  |        |         | POU2F2          |       | up**  | up*   |         |
| CTNNB1    |        |        |        | down*   | POLR2A          |       | up*   |       |         |
| CXCL2     |        |        |        | up*     | PTGR4           |       |       |       | down*   |
| CXCR2     |        |        |        | down*   | PRF1            |       |       |       | down*   |
| CXCR4     |        |        | down*  | down*   | PSMB5           |       | down* |       |         |
| FADD      |        | up*    |        |         | PTK2            | down* |       |       | down*   |
| FKBP5     | down** | down** | down*  | down*** | PTPN2           | up*   |       |       |         |
| FOXP3     |        | up*    |        |         | RUNX1           |       |       |       | up*     |
| FYN       |        |        | down*  |         | SELL            |       |       |       | down*   |
| GPR183    |        |        | down*  |         | SKI             |       | up*   |       |         |
| HAVCR2    |        | down*  |        |         | TBK1            |       | up*   |       |         |
| HLA-DOB   |        |        |        | up*     | TCF4            | up*   |       |       |         |
| HLA-DRA   |        |        |        | up*     | TFRC            |       |       |       | down**  |
| HLA-DRB3  |        |        |        | up*     | TGFR1           |       | up*   |       |         |
| HPRT1     | down*  |        | down** |         | TGFR2           |       |       |       | down*   |
| ICOSLG    | up*    | up*    |        |         | TNFRSF11A       | down* |       |       |         |
| IKZF1     |        |        |        | down*   | TNFRSF13B       | up*   |       |       |         |
| IL1R2     |        | down*  |        |         | TNFSF12         |       |       |       | up*     |
| IL1RL1    | down** |        | down*  |         | TRAF1           |       |       |       |         |
| IL2RA     |        |        |        | up*     | TRAF6           |       | up*   |       |         |
| IL3       |        | up*    |        |         | TUBB            |       |       |       | up**    |
|           |        |        |        |         |                 |       |       |       |         |
|           |        |        |        |         |                 |       |       |       |         |

**Supplementary Table 4. Differentially expressed genes detected by the NanoString analysis.** List of differentially expressed genes in FAP *versus* control subjects. Up: upregulated. Down: downregulated in FAP. \*p<0.05 ; \*\*p<0.01 ; \*\*\*p<0.001



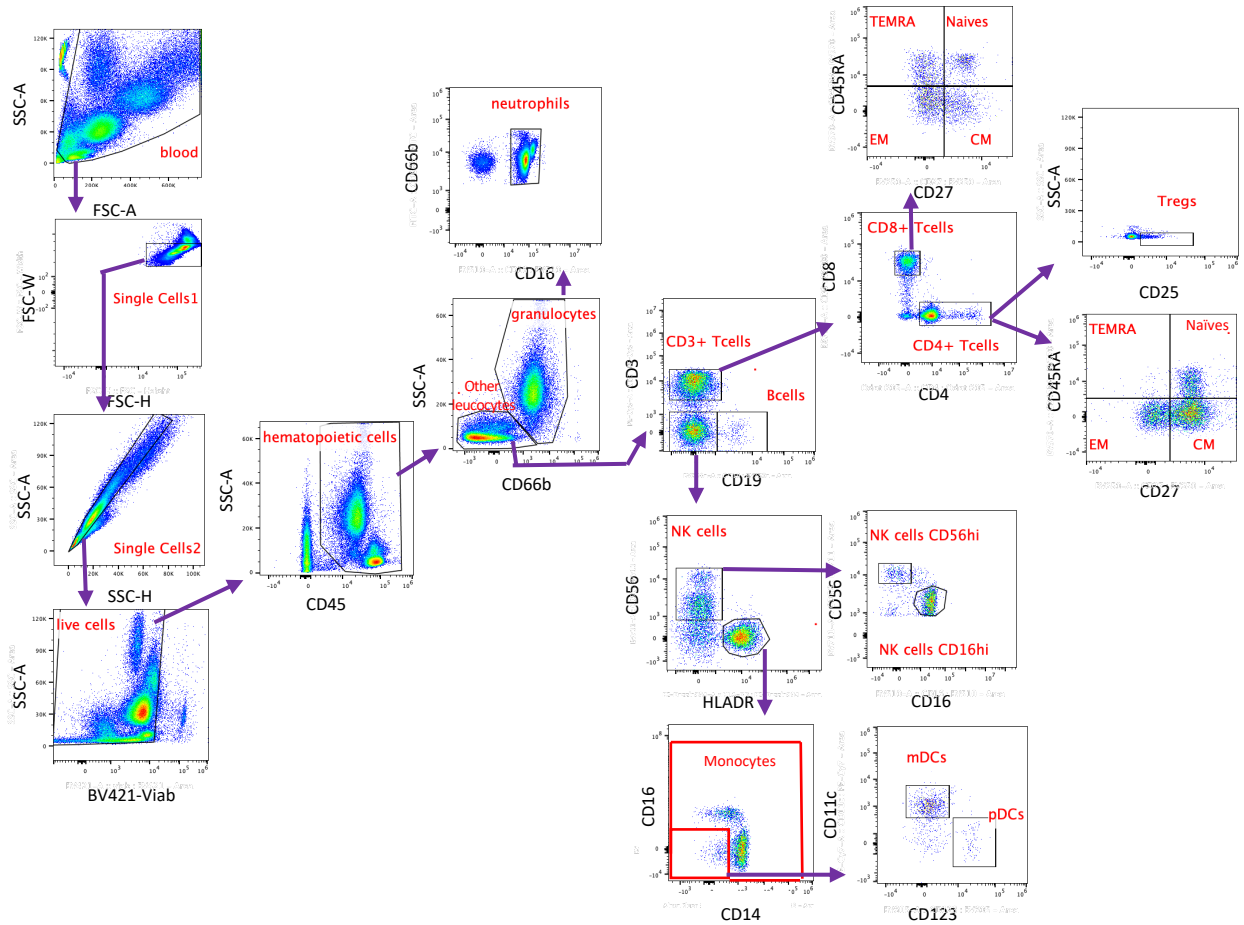

**Supplementary Figure 1. Whole blood immunophenotyping gating strategies.** Whole blood immune cells were stained with directly-coupled fluorescent antibodies (Supplementary Table 1) and analyzed by flow cytometry. The sequential gating strategies leading to the analyses of the main hematopoietic cell populations is depicted.

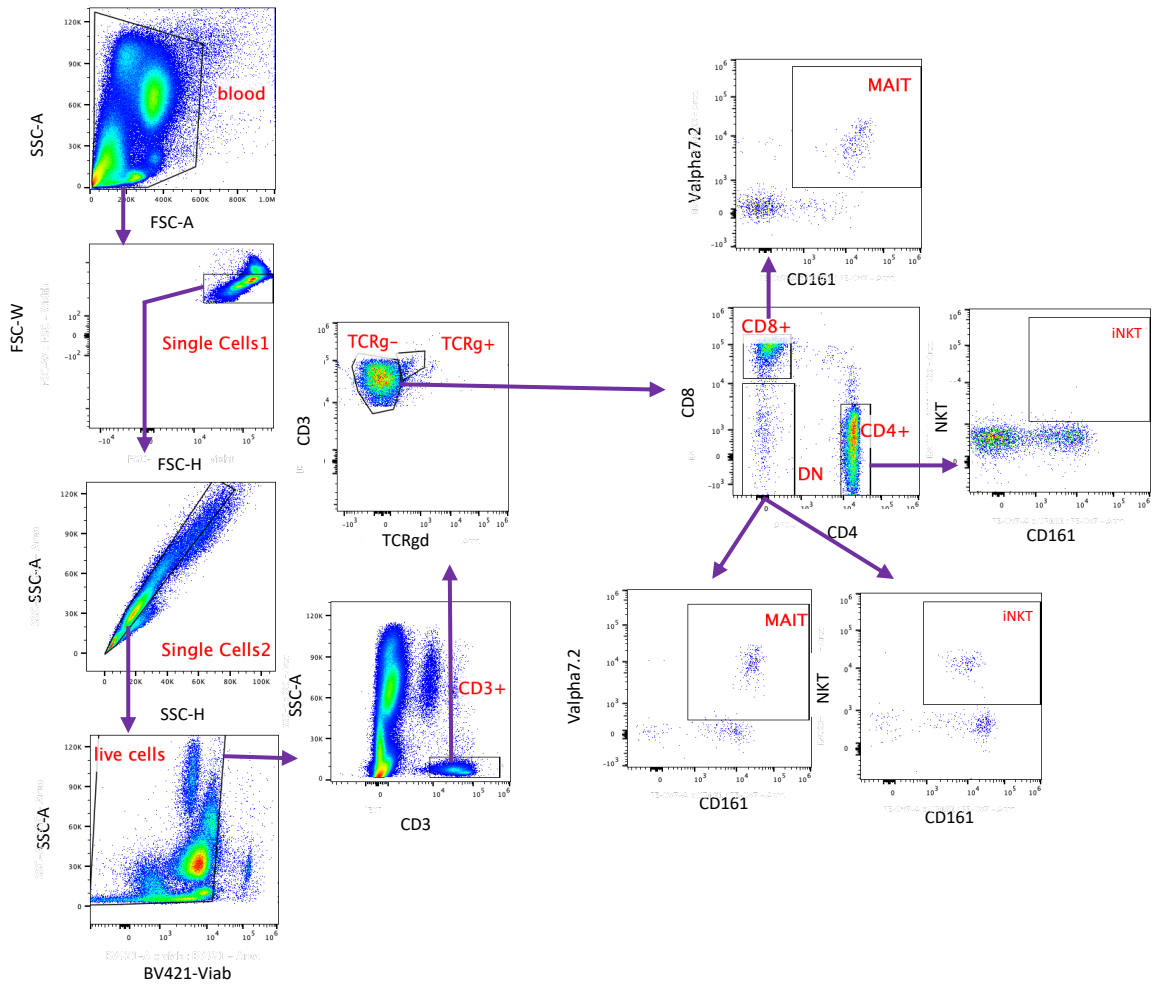

**Supplementary Figure 2. Whole blood immunophenotyping gating strategies.** Whole blood immune cells were stained with directly-coupled fluorescent antibodies (supplementary Table 1) and analyzed by flow cytometry. Sequential gating strategies leading to the analyses of the iNTK; MAIT and TCR $\gamma\delta$  T cell populations is depicted.

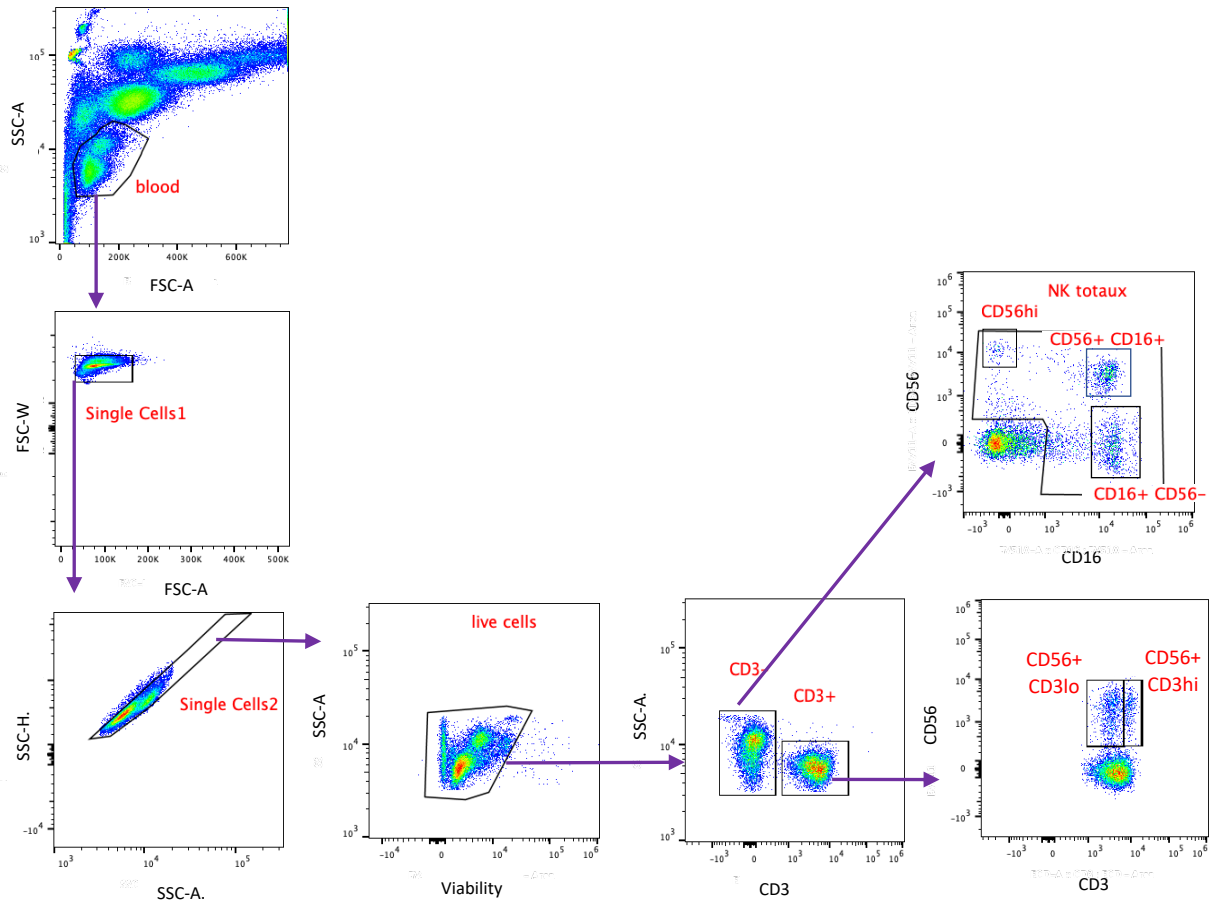

**Supplementary Figure 3. Whole blood immunophenotyping gating strategies.** Whole blood immune cells were stained with directly-coupled fluorescent antibodies (supplementary Table 1) and analyzed by flow cytometry. Sequential gating strategies leading to the analyses of the NK cells subpopulations, is depicted.

### A Quantifying microtubule organisation

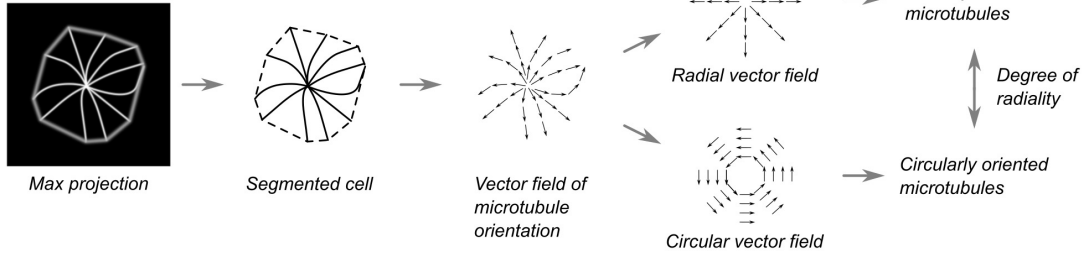

### B Degree of Radiality (DoR) example calculation

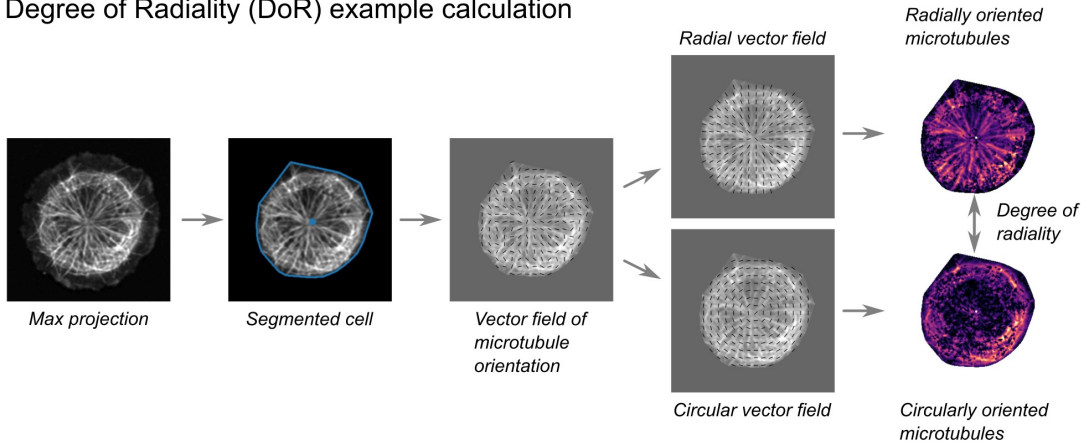

### C Morphology-aware cell sectioning

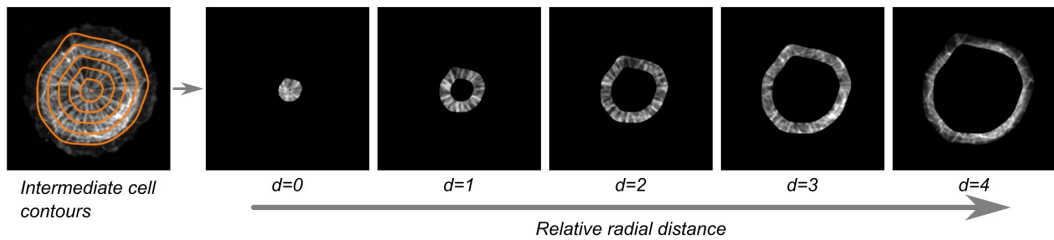

### D DoR values at different distances

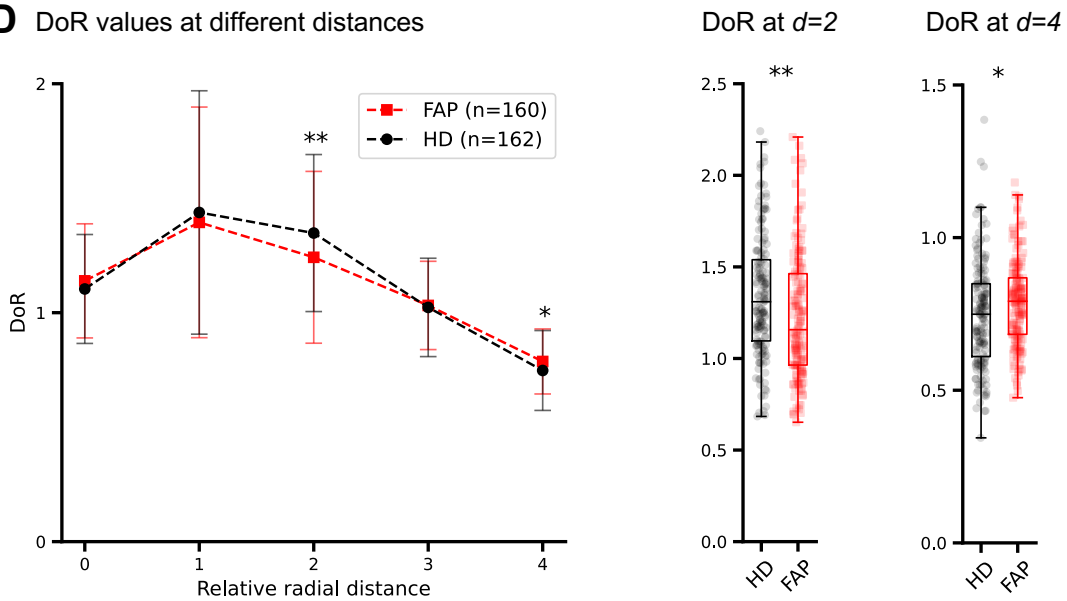

**Supplementary Figure 4. Quantitative analysis of microtubule patterns. (A-C)** Schematic representation of the methodology described in the Methods section. **(D)** Quantification of the Degree of Radiality (DoR) as a function of the relative radial distance from the cell center of mass. Data at d=2 (middle panel) are the same shown in Figure 10 C.

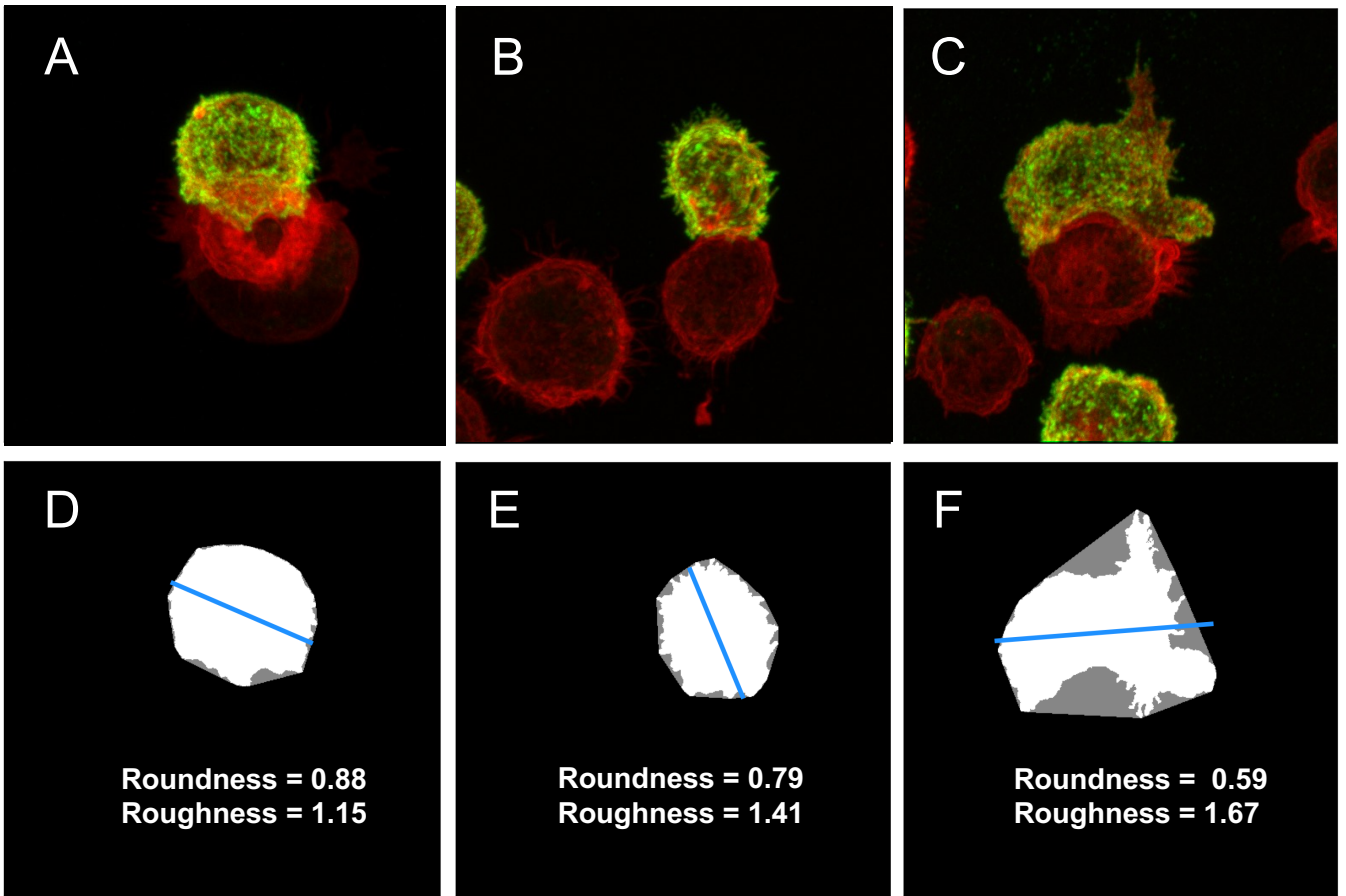

**Supplementary Figure 5. Quantitative analysis of CTL morphology at the immunological synapse.** CTLs engaged on immunological synapses with tumor target cells were prepared, observed and analyzed as described in Methods. Analyses were conducted on maximum intensity projections of confocal microscopy image stacks. (A-C) Examples of distinct morphologies observed in T cell–target cell conjugates staining of CD8 (green) and actin (red) for three example cells. (D-F) T cell masks generated by thresholding the CD8 signal are displayed in white, overlapped to their convex hull (grey) and the fitted major axis (MA; blue). The roughness of the cell was measured as the ratio of the perimeter of the cell to the perimeter of its convex hull. Higher values indicate higher degrees of cell surface roughness. The roundness was calculated as  $(4 \times \text{T cell mask area}) / (\pi \times \text{MA}^2)$ . A roundness closer to 1.0 indicates a shape closer to a perfect circle. While the metrics are not completely unrelated, roundness is less sensitive to local irregularities being based on the area and thus can be seen as generally providing information on the cell larger scale morphological irregularity. Roughness, on the other hand, better captures variations in small scale irregularities of the cell surface. The Crofton perimeter was used, which approximates the perimeter based on the Crofton method in four directions. The MA is defined as the length of the major axis of an ellipse with the same normalized second central moment as the mask.

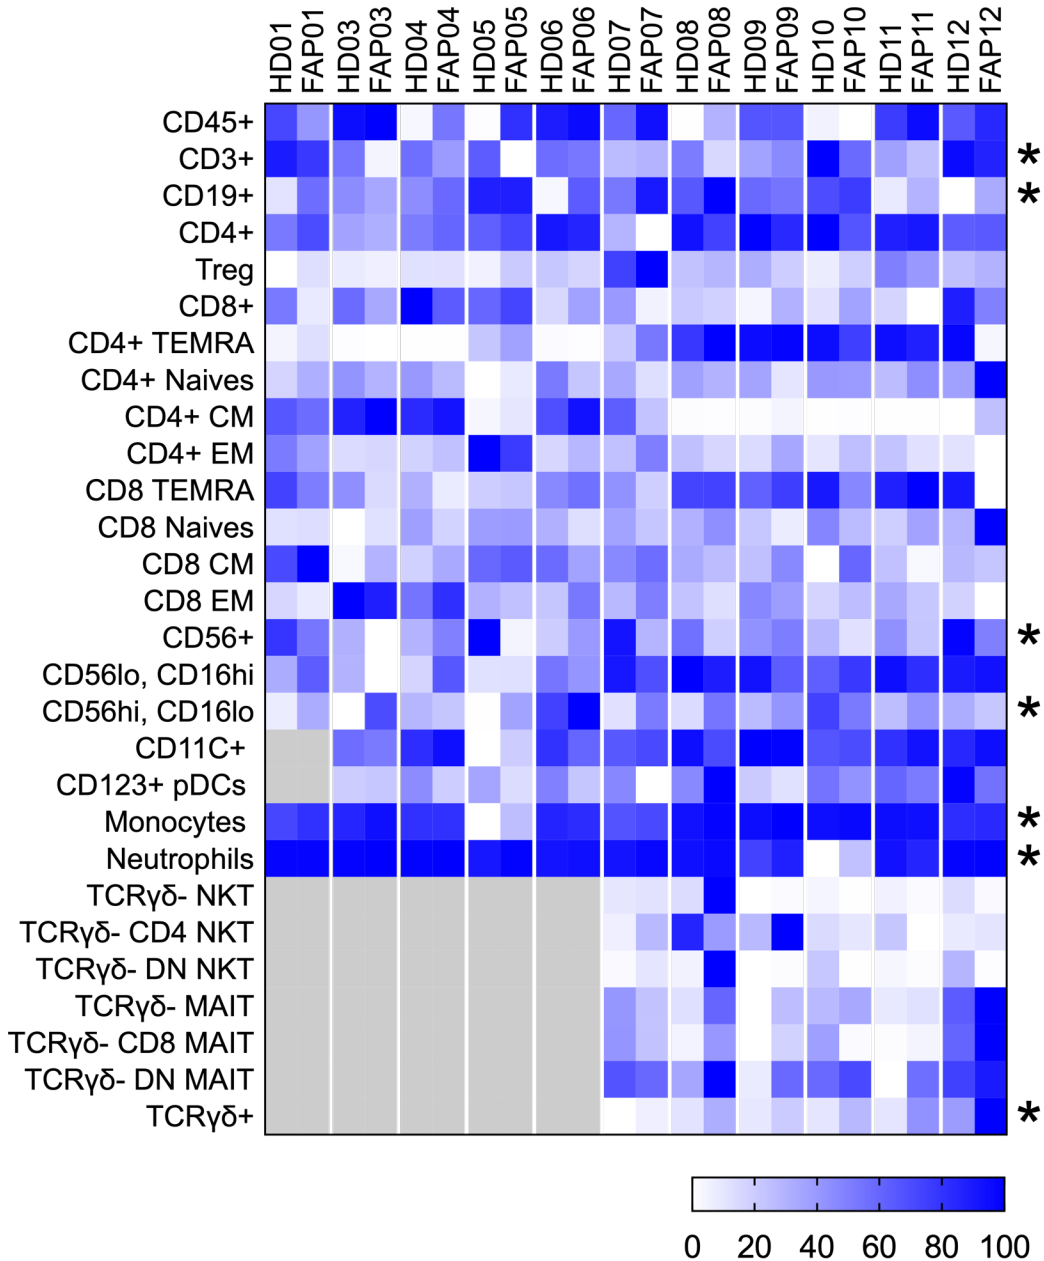

**Supplementary Figure 6. Whole blood immunophenotyping by multiparameter flow cytometry.**

Whole blood was prepared, and immune cells were stained with directly-coupled fluorescent antibodies as detailed in materials and methods and in supplemental Table 1. Cells were analyzed by multiparameter flow cytometry. Gating strategies described and cell surface molecules defining cell populations are depicted in Supplemental Figure 1 and include lymphocytes, monocytes (Mono), dendritic cells (DC), neutrophils (Neutro), CD4 and CD8 T cells, NK, NKT, MAIT, T $\gamma$  $\delta$  cells. The percentage of cells expressing the indicated markers for pairs of sex and age matched FAP and healthy subjects (n = 11, see Figure 3) is shown. Data were normalized and color-coded by setting the minimum value in each row at 0% (white) and the maximum value at 100% (dark blue). Gray squares indicate missing samples. Asterisks indicate markers with a significant difference between HD and FAP groups (see Figure 3; \*p<0.05).

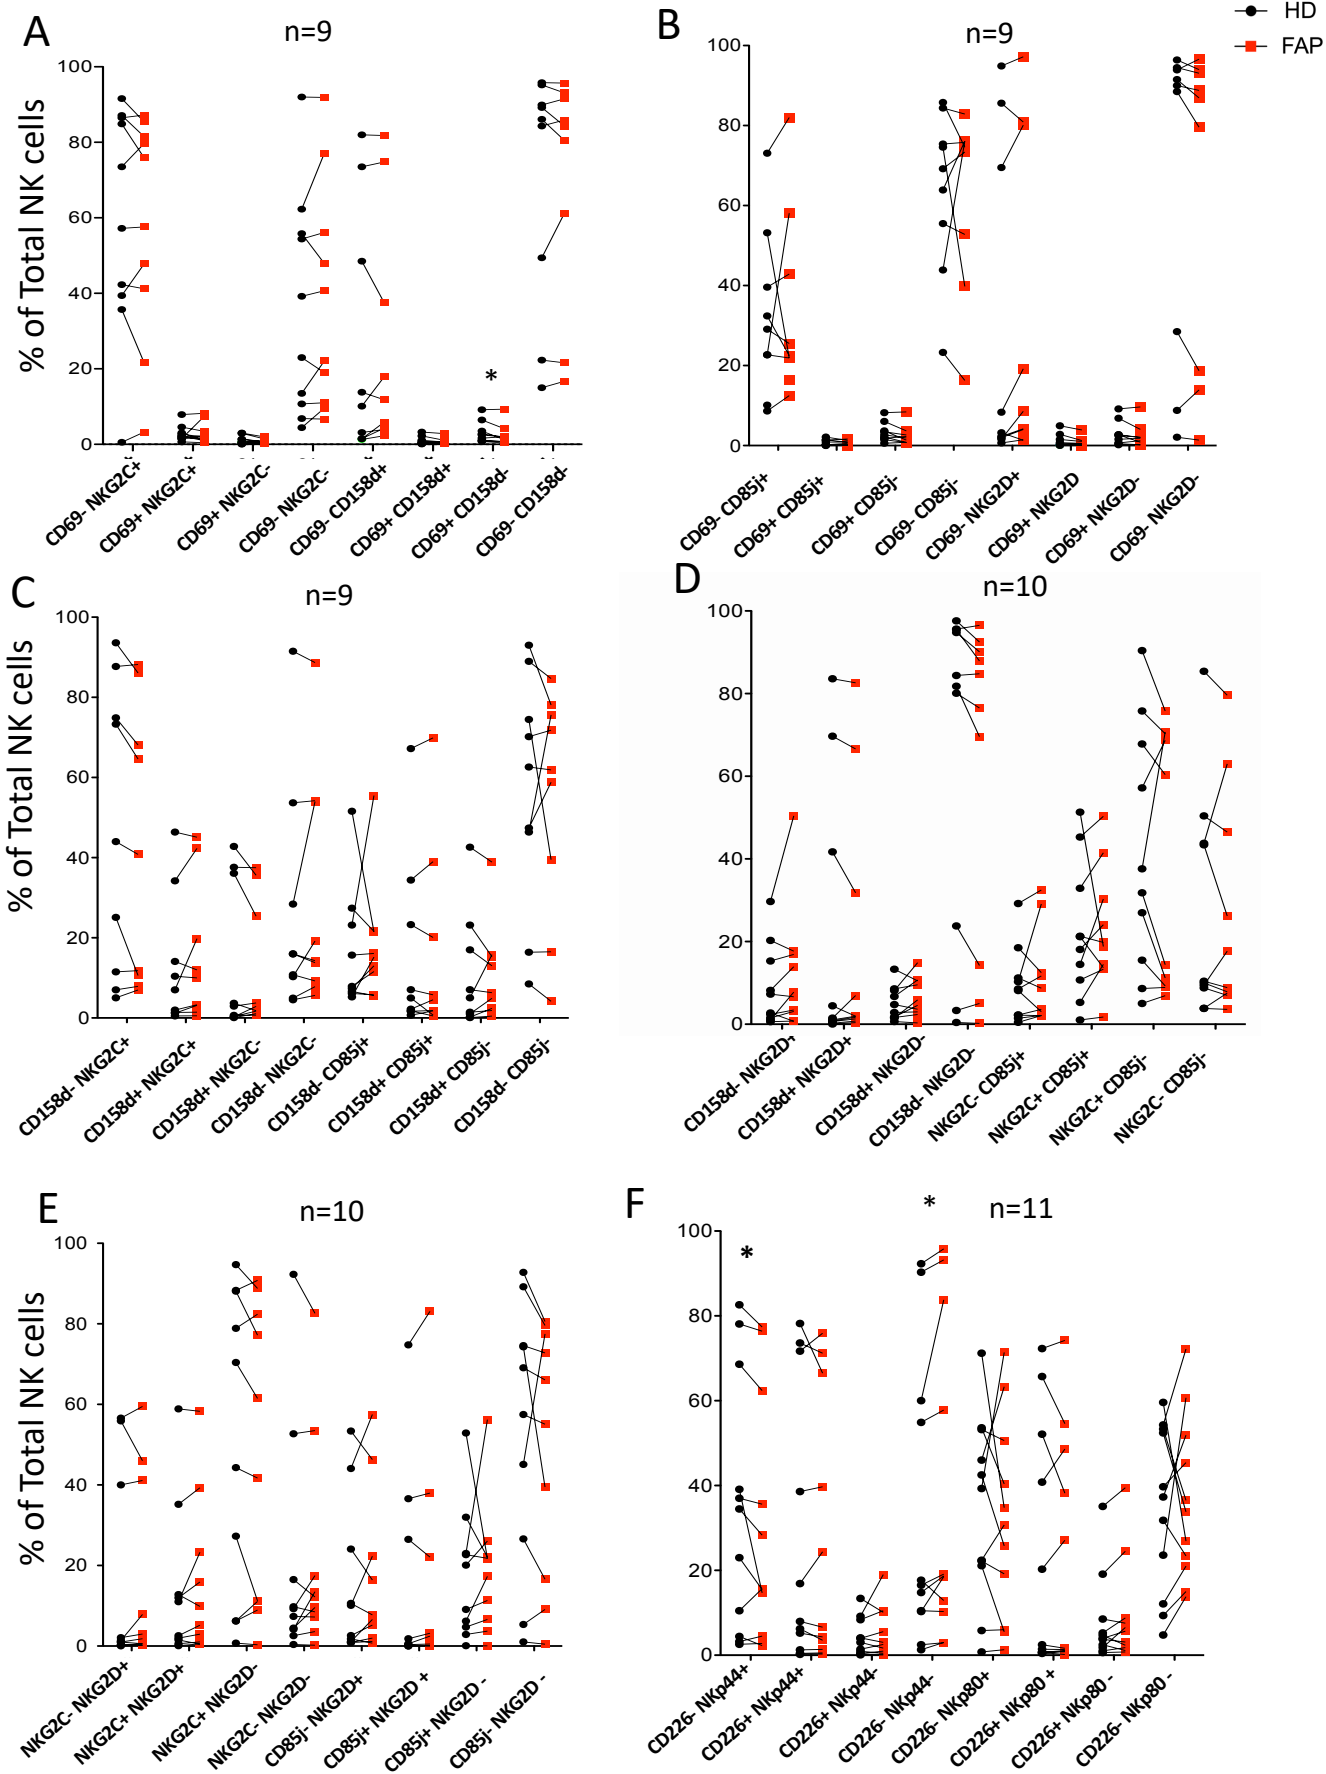

Supplementary Figure 7. Whole blood immunophenotyping of NK cell subpopulations  
(Legend as in Supplementary Figure 9)

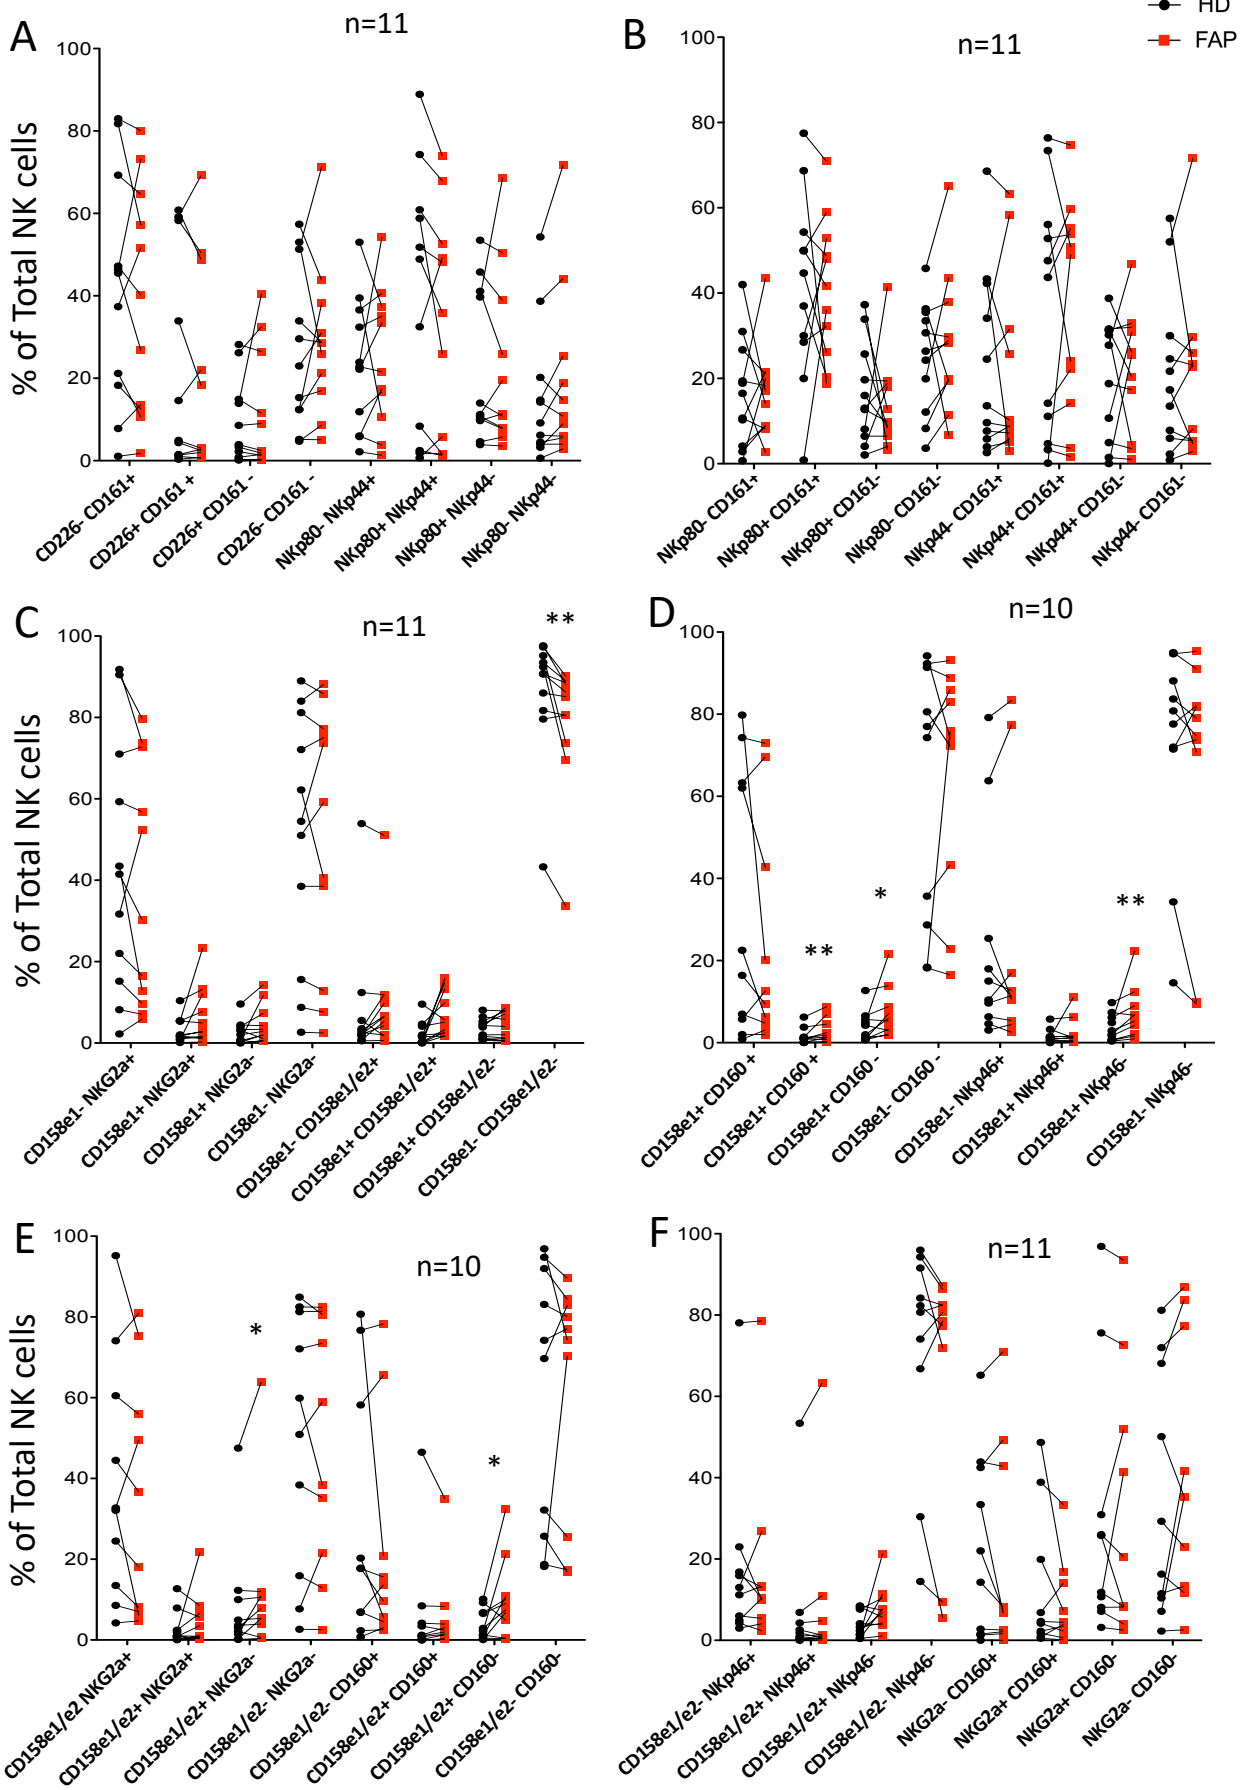

**Supplementary Figure 8. Whole blood immunophenotyping of NK cell subpopulations**  
(Legend as in Supplementary Figure 9)



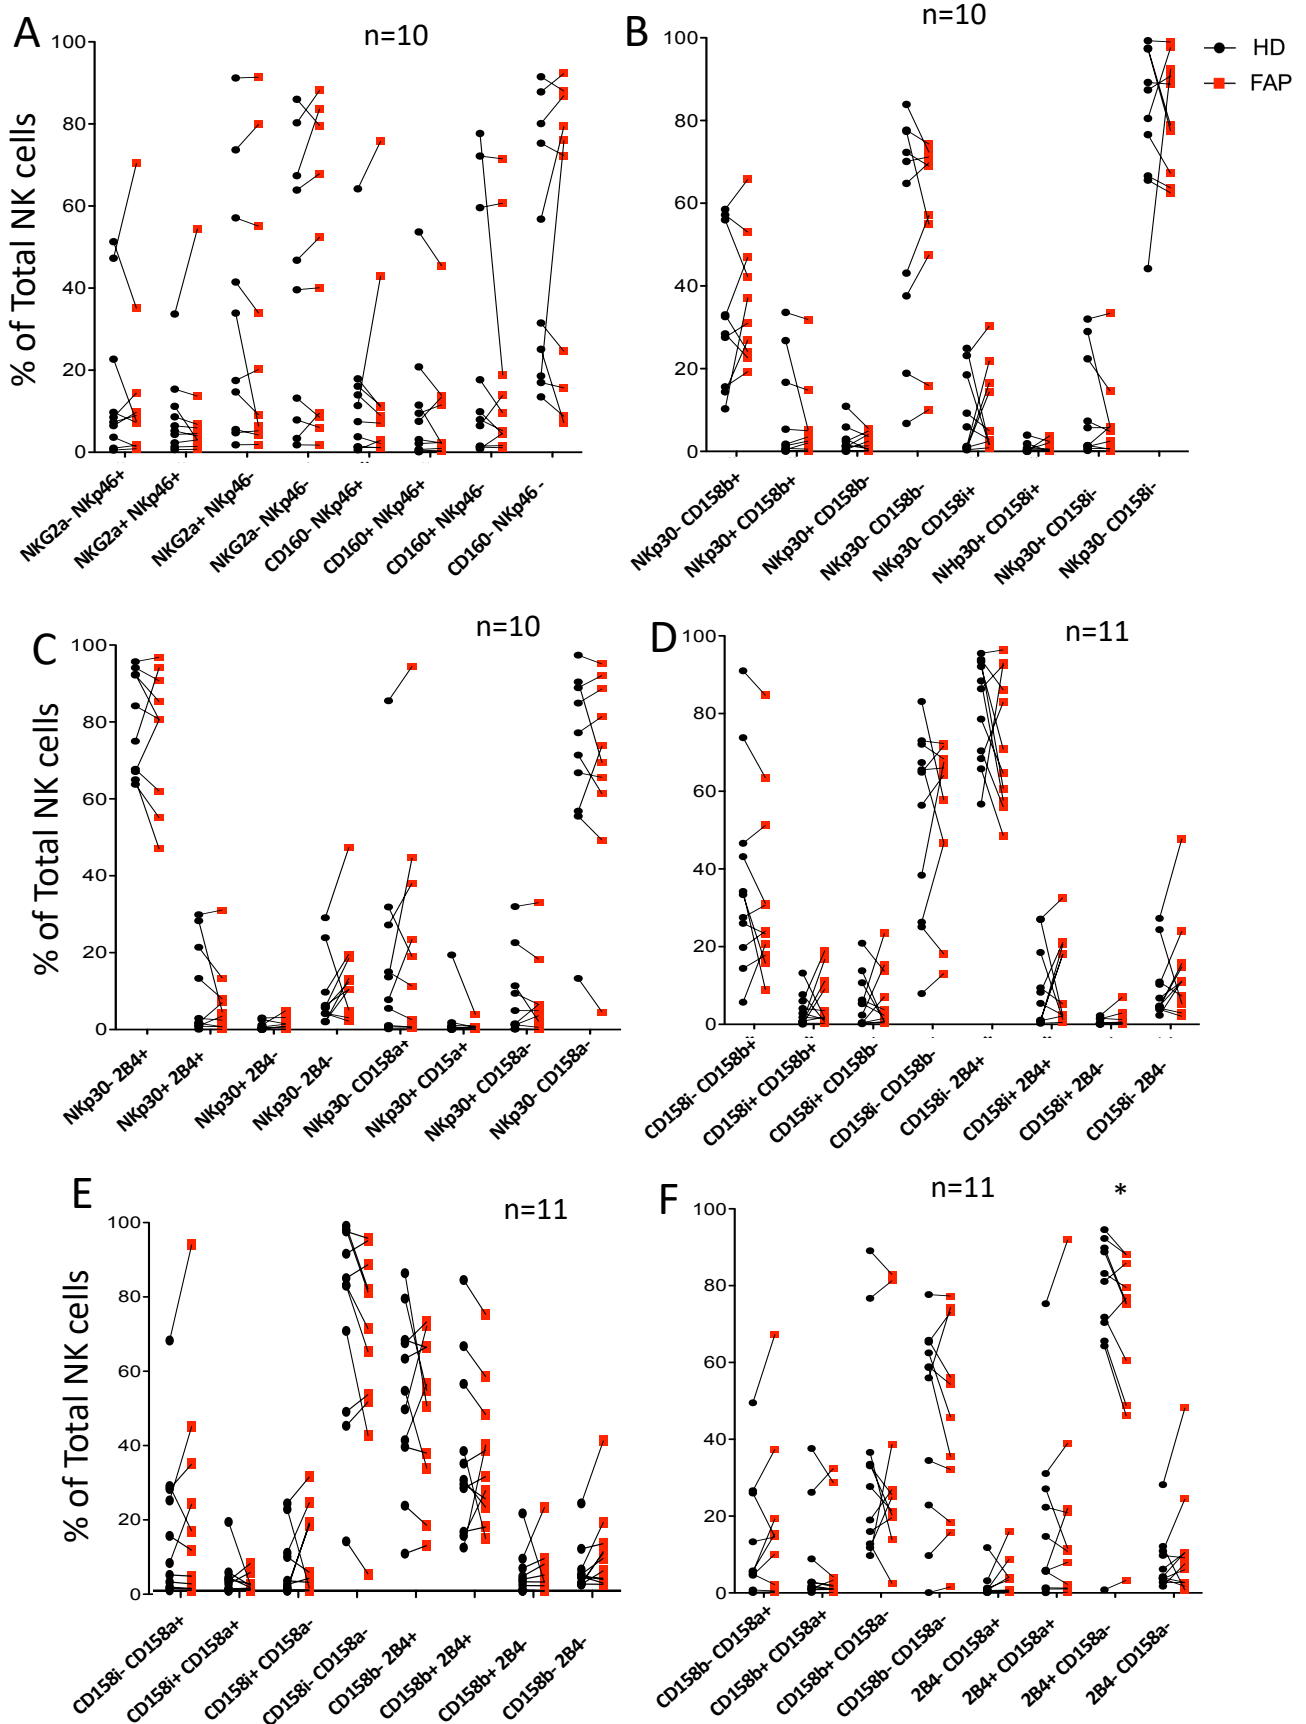

**Supplementary Figure 9. Whole blood immunophenotyping of NK cell subpopulations.**

Cells were immunophenotyped following the FACS gating strategy in Figure 1C. Each pair of sex and age matched FAP (red square dots) and healthy (black round dots) subjects is linked by a line. Each dot represents a subject. Percentage of cells expressing the characteristic markers is plotted. Significance was determined by the Wilcoxon rank test. \*\* $p < 0.01$ , \* $p < 0.05$ . Significant differences are summarized in Table 1.

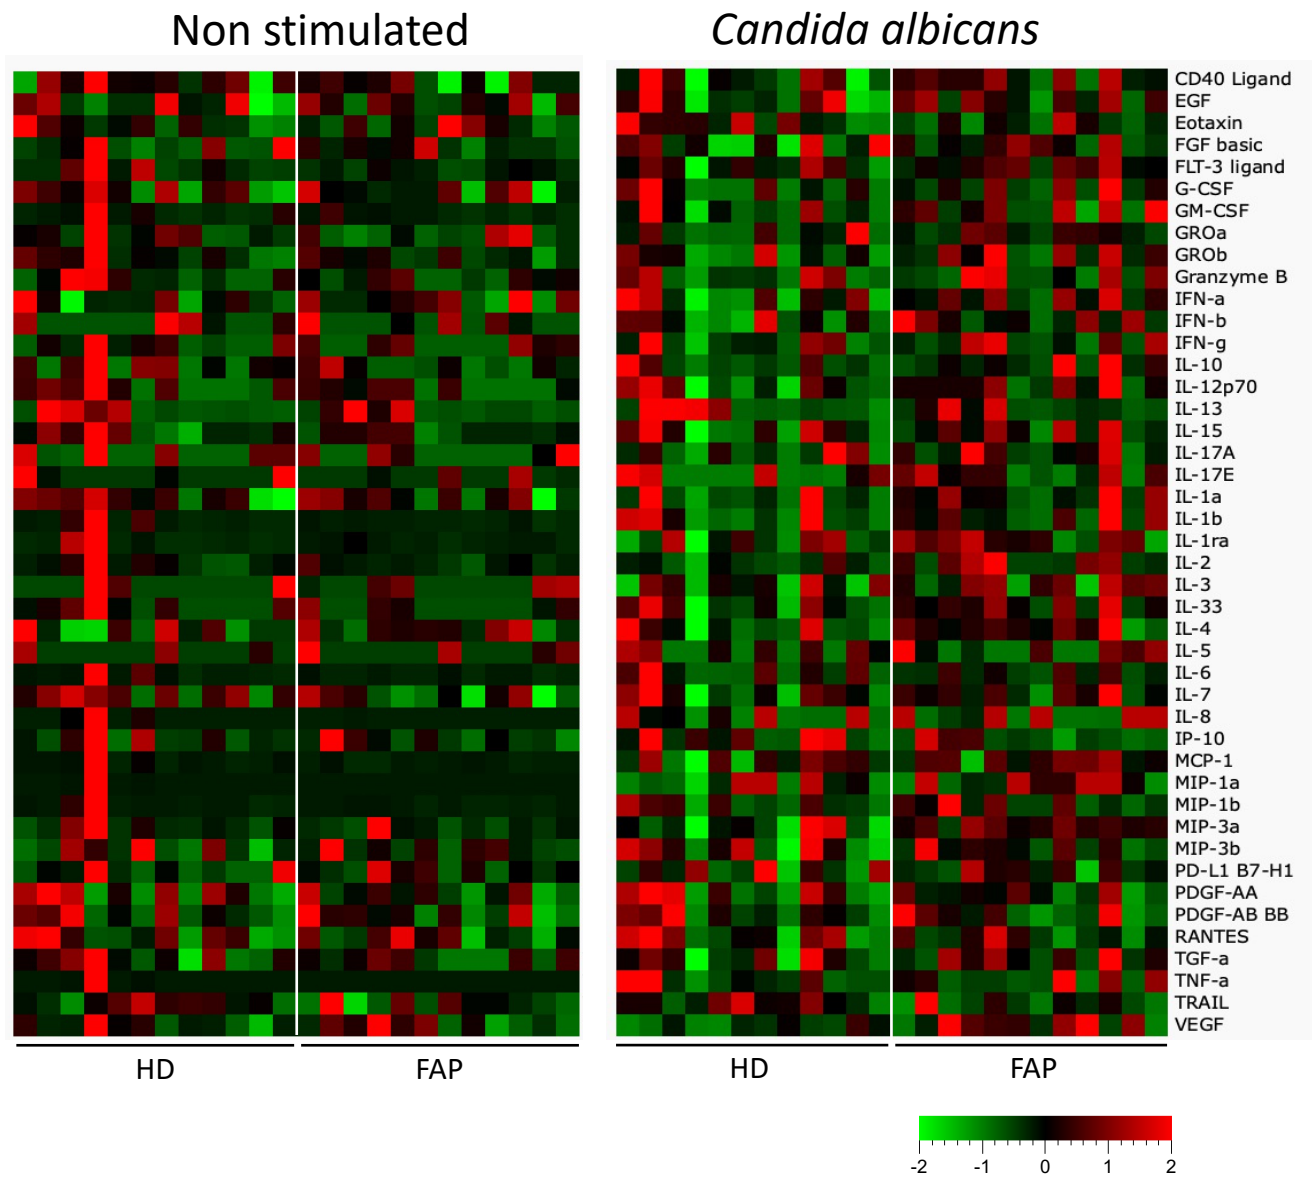

**Supplementary Figure 10. Protein secretion pattern in whole blood.**  
 (Figure legend as in Supplementary Figure 11)

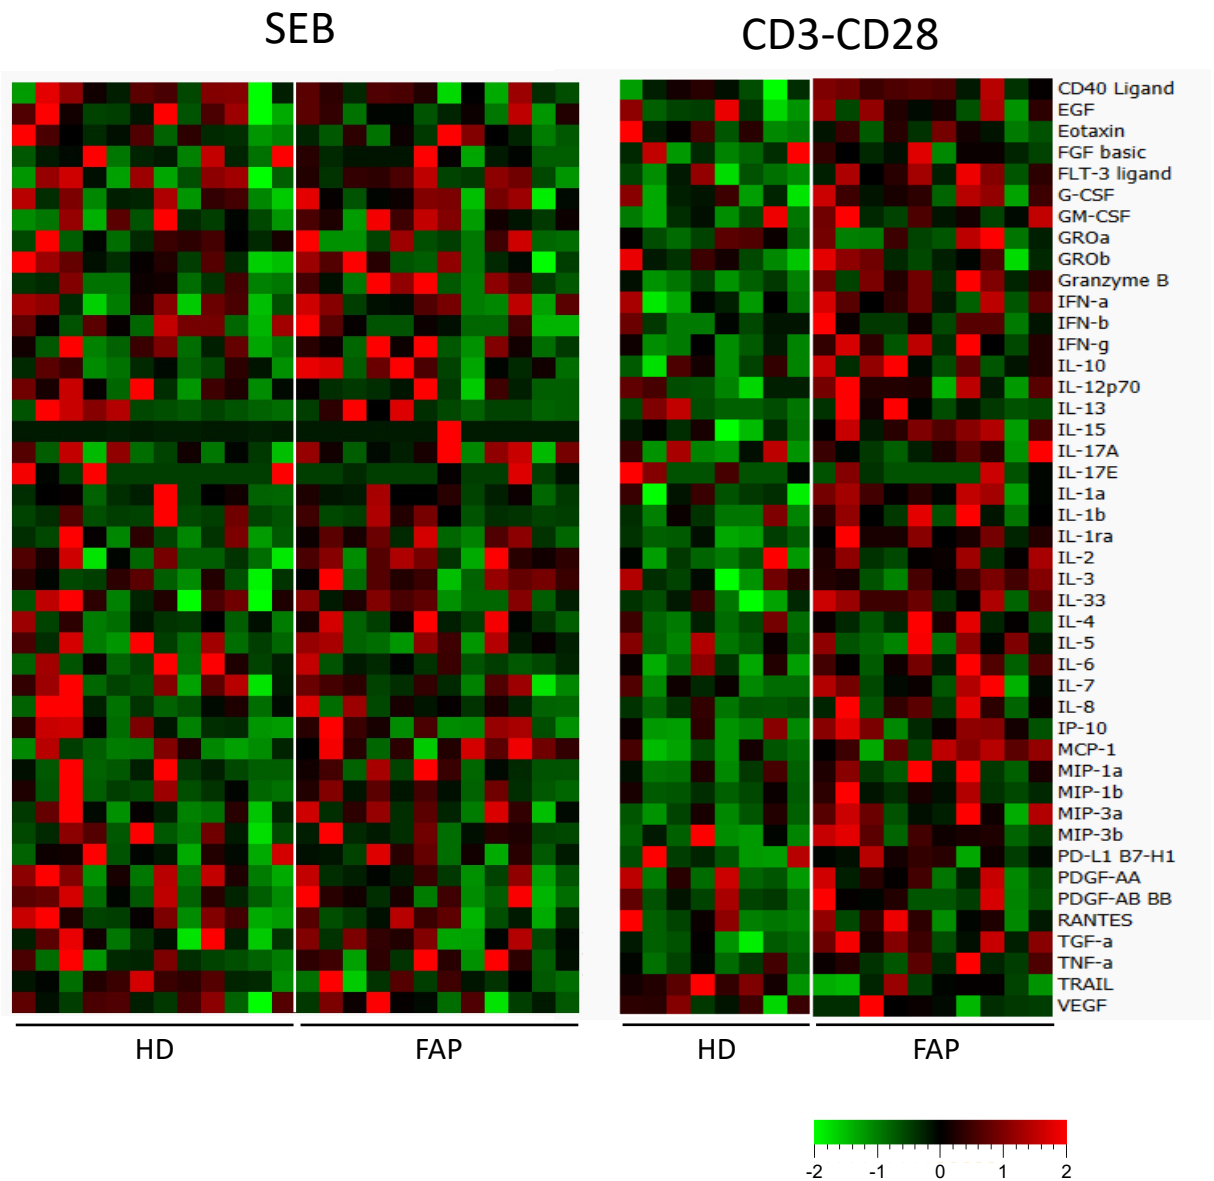

**Supplementary Figure 11. Protein secretion pattern in whole blood.** Whole blood from pairs of sex and age matched FAP and healthy subjects (HD) (one pair per incubation) was set into TruCulture tubes with no stimulus, *Candida albicans*, SEB, or anti-CD3+anti-CD28 stimuli and incubated during 22 hours at 37°C. Cells and supernatants were separated and the latter were kept frozen. All 12 pairs of FAP and healthy subjects were then analyzed together by Luminex technology using a panel of 44 analytes (supplemental table 3, Y-axis). Heat maps show the results for all the analytes. Color scale from green (-2) to bright red (2). Note that sample of patients that did not respond to anti-CD3+anti-CD28 stimulation are not included in this analysis.

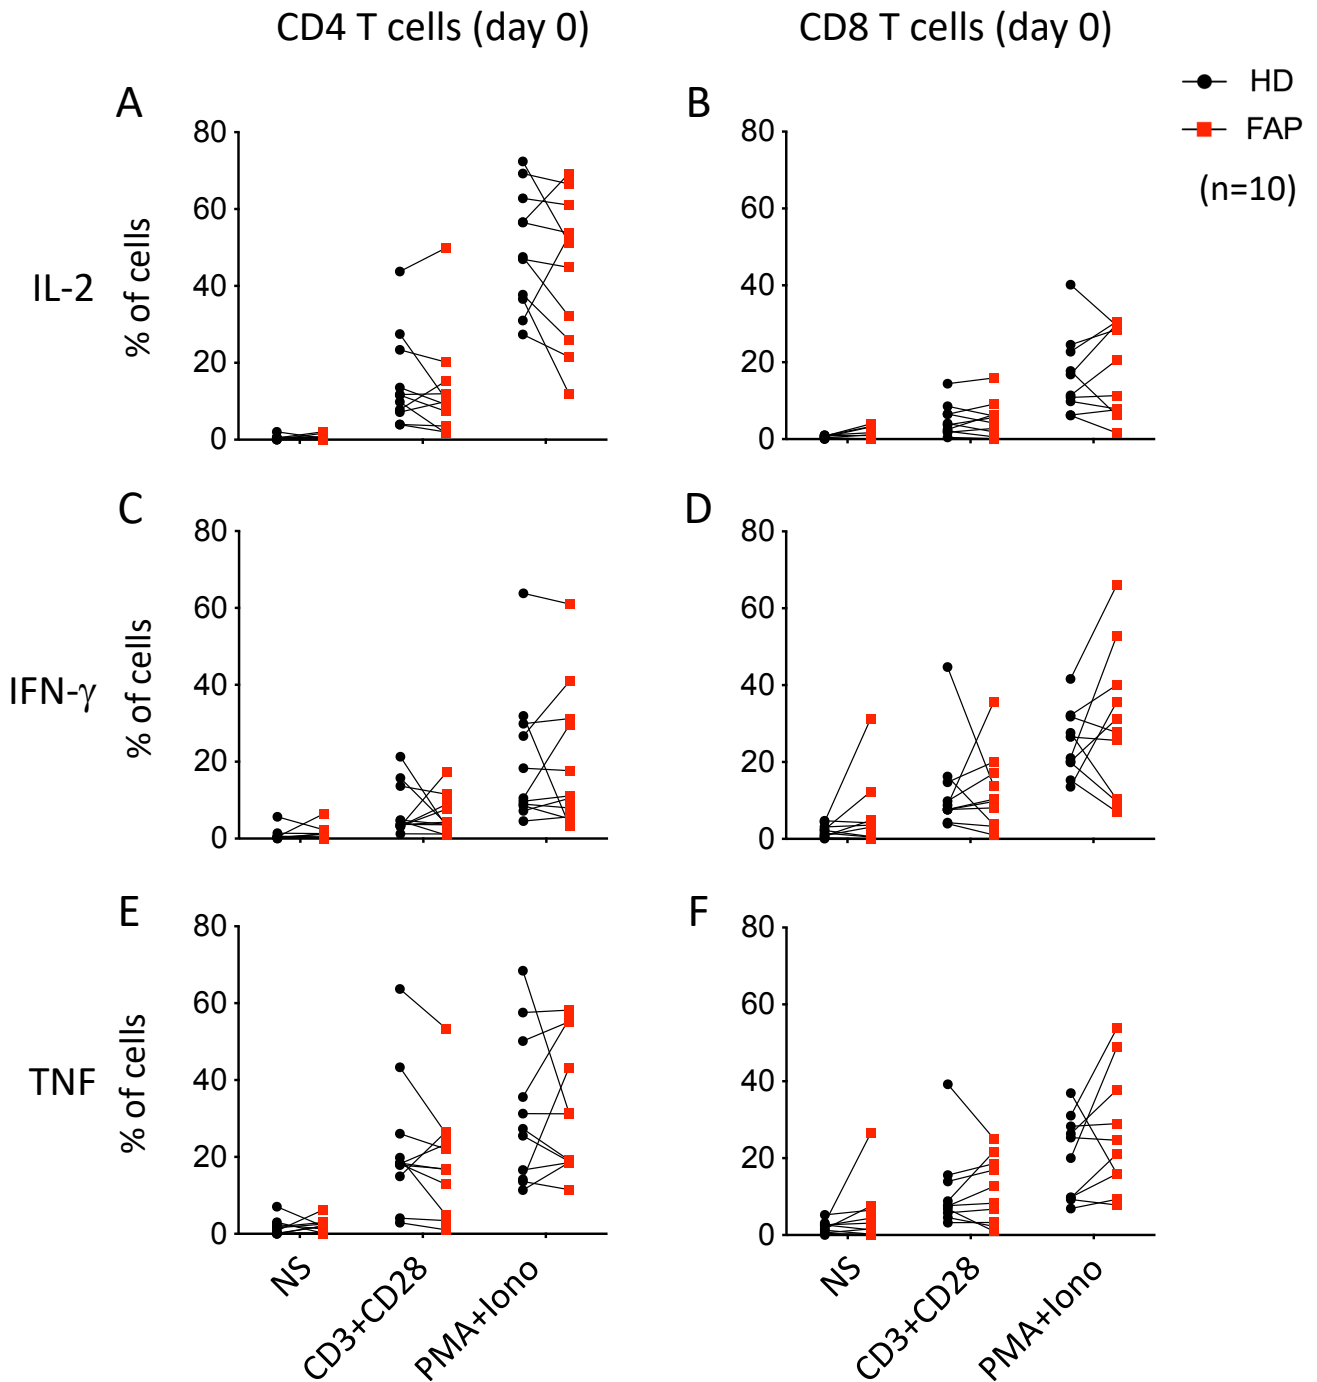

**Supplementary Figure 12. Cytokine production by PBMC (day 0).** Freshly isolated PBMC, (day 0), were left unstimulated (NS) or stimulated for 6 h with anti-CD3+anti-CD28, or with PMA+ionomycin. CD4<sup>+</sup> and CD8<sup>+</sup> T cells expressing IL-2, IFN $\gamma$  and TNF $\alpha$  were monitored by intracellular cytokine staining and flow cytometry. Plots show the percentage of CD4 and CD8 T cells expressing IL-2 (**A**, **B**), IFN $\gamma$  (**C**, **D**), TNF $\alpha$  (**E**, **F**). Each pair of sex and age matched FAP (red, square dots) and healthy (round black dots) subjects is shown linked by a line. Each dot represents a subject. n = number of pairs. Significance was determined by the Wilcoxon rank test. No significant differences were found under any condition,  $p \geq 0.05$ .

### CD4 T cells (day 7)

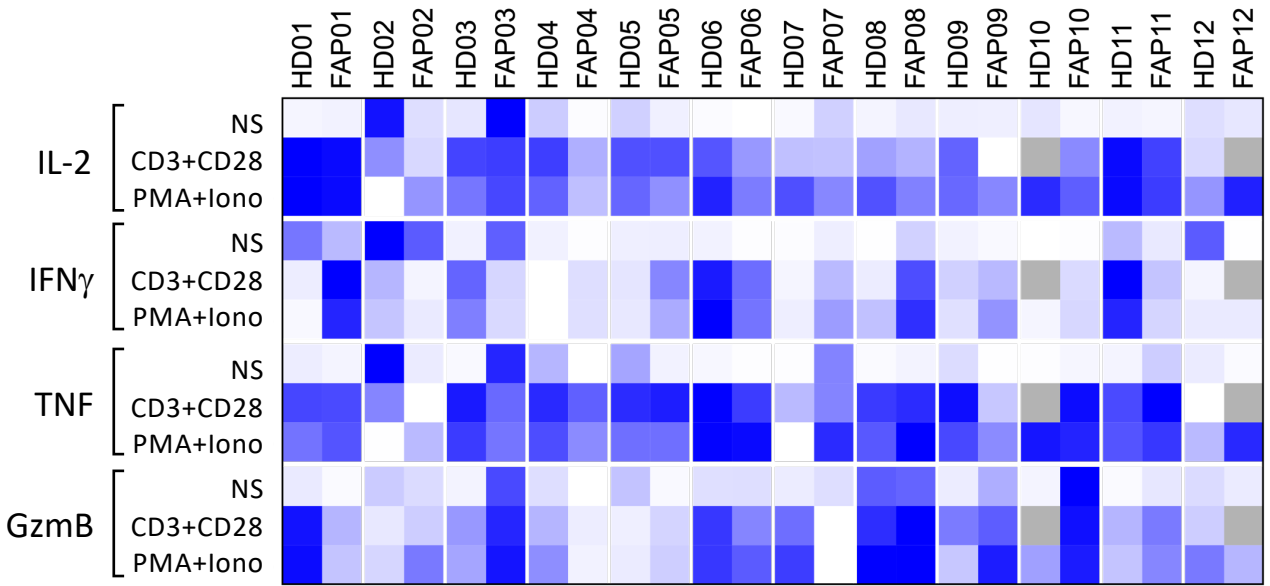

### CD8 T cells (day 7)

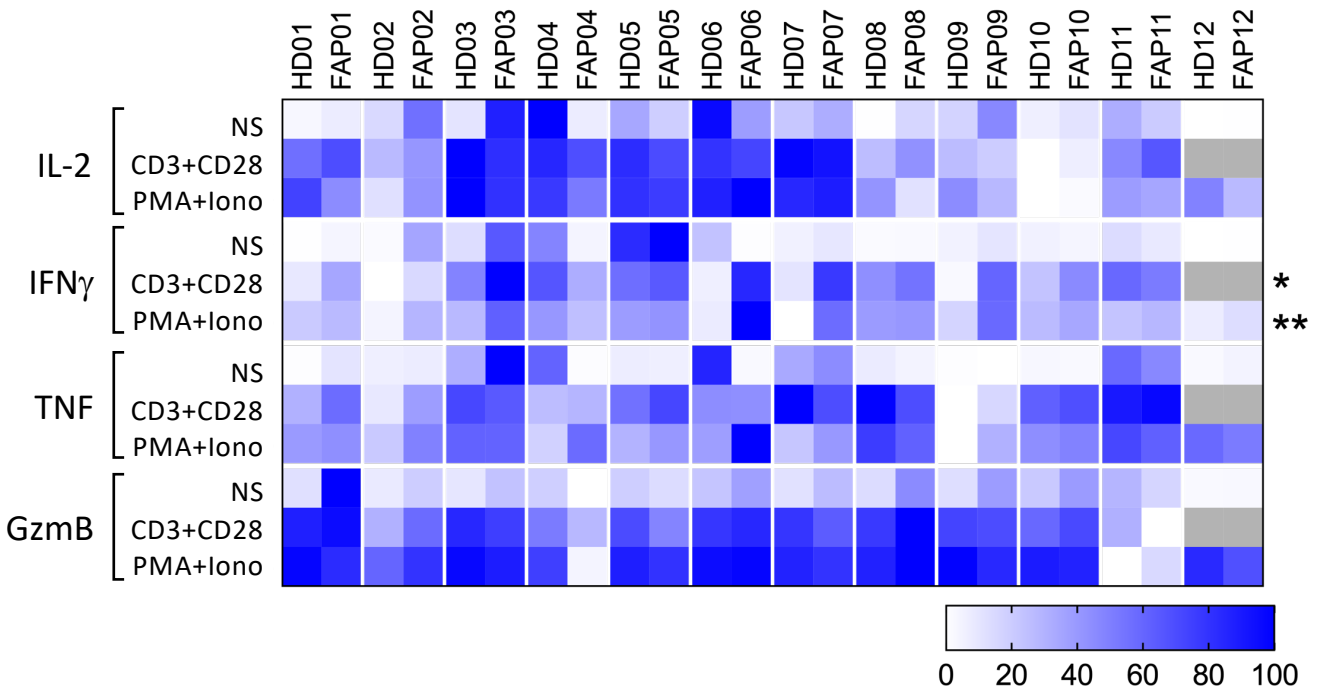

**Supplementary Figure 13. Cytokine production by *in vitro*-expanded PBMC.** T cells were expanded *in vitro* for 7 days by activation with anti-CD3+CD28 and cultured with IL-2. At day 7, cells were washed and restimulated for 6 h with anti-CD3+CD28 or with PMA+ionomycin. CD4<sup>+</sup> and CD8<sup>+</sup> T cells expressing IL-2, IFN- $\gamma$  and TNF were monitored by intracellular cytokine staining and flow cytometry. In parallel, granzyme B expression was monitored. The percentage of CD4<sup>+</sup> and CD8<sup>+</sup> T cells expressing IL-2, IFN- $\gamma$ , TNF and granzyme-B (GzmB) for pairs of sex and age matched FAP and healthy subjects (n = 12, see Figure 7) is shown. Data were normalized and color-coded by setting the minimum value in each row at 0% (white) and the maximum value at 100% (dark blue). Gray squares indicate missing samples. Asterisks indicate conditions with a significant difference between HD and FAP groups (determined as described in Figure 7; \*\*p < 0.01, \*p < 0.05).

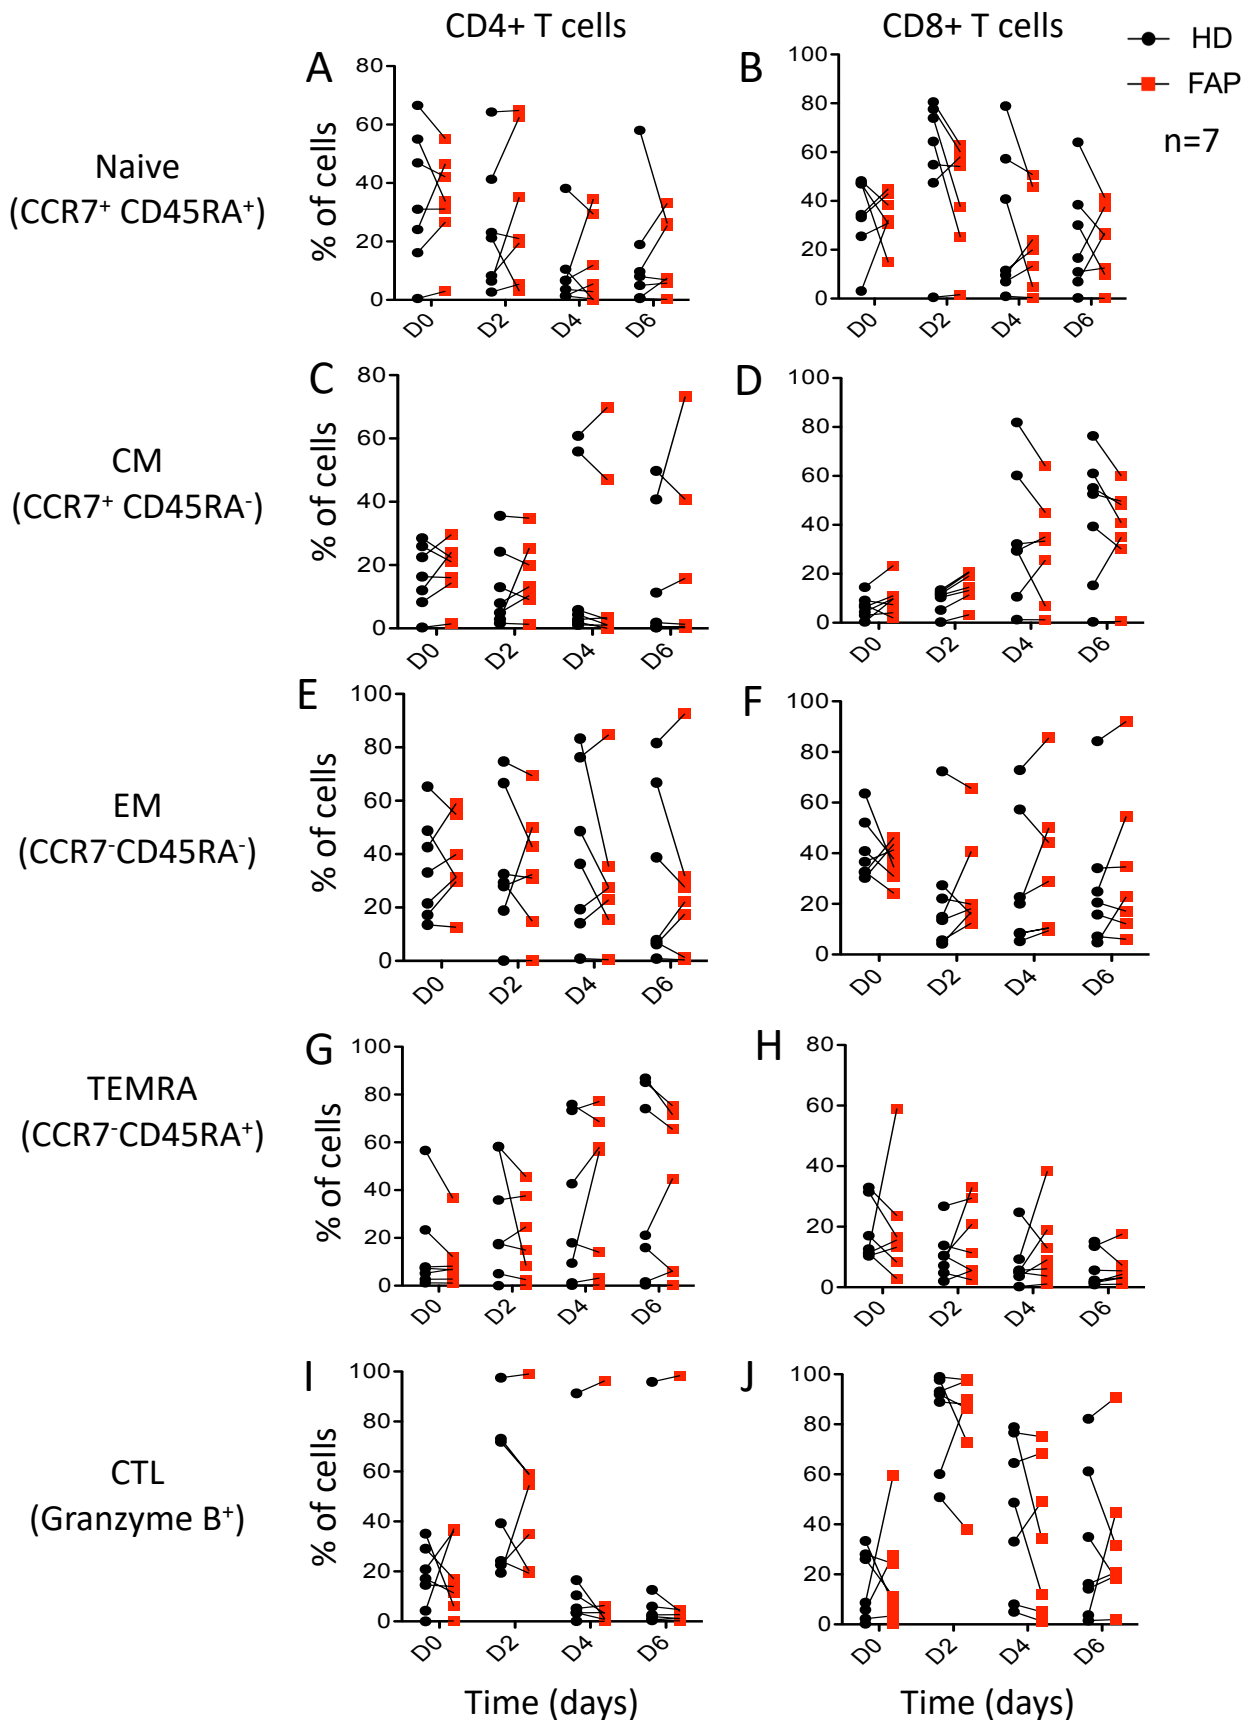

**Supplementary Figure 14. *In vitro* differentiation of PBMC.** Cells were stimulated *in vitro* with anti-CD3+CD28 Abs and IL-2 for 6 days. The expression of differentiation markers defining naïve, central memory (CM), effector memory (EM), terminally-differentiated effector cells (TEMRA) and CTL, was monitored at the indicated time points for CD4<sup>+</sup> and CD8<sup>+</sup> T cells, by FACS. Pairs of sex and age matched FAP (red, square dots) and healthy (black, round dots) subjects are shown linked by a line. Each dot represents a subject. Significance was determined by the Wilcoxon rank test, n=7 pairs. No significant differences were found ( $p > 0.05$ ).
